# Supplementary material for: Transcriptome comparisons of in vitro intestinal epithelia grown under static and microfluidic gut-on-chip conditions with in vivo human epithelia
Source: PubMed Central journal article supplement (PMC7864925; doi:10.1038/s41598-021-82853-6), 2021-02-05
Supplement: 41598_2021_82853_MOESM1_ESM.pdf [file 41598_2021_82853_MOESM1_ESM.pdf]

**Transcriptome comparisons of *in vitro* intestinal epithelia grown under static and microfluidic gut-on-chip conditions with *in vivo* human epithelia**

**Kornphimol Kulthong, Guido J.E.J. Hooiveld, Loes Duivenvoorde, Ignacio Miro Estruch, Victor Marin, Meike van der Zande and Hans Bouwmeester**

**Supplementary Table S1. Upregulated pathways in Caco-2 cells cultured under dynamic culture conditions versus static culture conditions**

| <b>KEGG pathway name</b>                    | <b>KEGG Category</b>                 | <b>KEGG category subgroup</b>       | <b>SIZE</b> | <b>ES</b> | <b>NES</b> | <b>NOM p-val</b> | <b>FDR q-val</b> |
|---------------------------------------------|--------------------------------------|-------------------------------------|-------------|-----------|------------|------------------|------------------|
| Ribosome biogenesis in eukaryotes           | Genetic information processing       | Translation                         | 76          | 0.77      | 2.52       | 0.0E+00          | 0.0E+00          |
| Proteasome                                  | Genetic information processing       | Folding, sorting and degradation    | 43          | 0.79      | 2.37       | 0.0E+00          | 0.0E+00          |
| Spliceosome                                 | Genetic information processing       | Transcription                       | 128         | 0.67      | 2.36       | 0.0E+00          | 0.0E+00          |
| RNA transport                               | Genetic information processing       | Translation                         | 146         | 0.64      | 2.32       | 0.0E+00          | 0.0E+00          |
| Protein processing in endoplasmic reticulum | Genetic information processing       | Folding, sorting and degradation    | 160         | 0.60      | 2.18       | 0.0E+00          | 0.0E+00          |
| RNA polymerase                              | Genetic information processing       | Transcription                       | 29          | 0.75      | 2.05       | 0.0E+00          | 8.7E-05          |
| Cytosolic DNA sensing pathway               | Organismal systems                   | Immune system                       | 58          | 0.64      | 2.01       | 0.0E+00          | 1.7E-04          |
| Antigen processing and presentation         | Organismal systems                   | Immune system                       | 67          | 0.62      | 2.01       | 0.0E+00          | 1.6E-04          |
| TNF signaling pathway                       | Environmental information processing | Signal transduction                 | 110         | 0.58      | 2.00       | 0.0E+00          | 2.2E-04          |
| NF Kappa-B signaling pathway                | Environmental information processing | Signal transduction                 | 97          | 0.58      | 1.96       | 0.0E+00          | 3.5E-04          |
| NOD-like receptor signaling pathway         | Organismal systems                   | Immune system                       | 168         | 0.53      | 1.93       | 0.0E+00          | 5.6E-04          |
| Cell cycle                                  | Cellular processes                   | Cell growth and death               | 124         | 0.55      | 1.92       | 0.0E+00          | 6.5E-04          |
| mRNA surveillance pathway                   | Genetic information processing       | Translation                         | 87          | 0.54      | 1.82       | 0.0E+00          | 3.4E-03          |
| Osteoclast differentiation                  | Organismal systems                   | Development and regeneration        | 122         | 0.51      | 1.81       | 0.0E+00          | 3.6E-03          |
| Necroptosis                                 | Cellular processes                   | Cell growth and death               | 128         | 0.50      | 1.77       | 0.0E+00          | 6.2E-03          |
| Protein export                              | Genetic information processing       | Folding, sorting and degradation    | 22          | 0.68      | 1.76       | 3.3E-03          | 6.7E-03          |
| Snare interactions in vesicular transport   | Genetic information processing       | Folding, sorting and degradation    | 33          | 0.62      | 1.74       | 3.8E-03          | 8.1E-03          |
| Mismatch repair                             | Genetic information processing       | Replication and repair              | 23          | 0.66      | 1.74       | 4.1E-03          | 8.3E-03          |
| Apoptosis multiple species                  | Cellular processes                   | Cell growth and death               | 31          | 0.62      | 1.73       | 4.7E-03          | 8.6E-03          |
| IL-17 signaling pathway                     | Organismal systems                   | Immune system                       | 93          | 0.51      | 1.72       | 3.7E-04          | 9.5E-03          |
| p53 signaling pathway                       | Cellular processes                   | Cell growth and death               | 72          | 0.52      | 1.70       | 1.1E-03          | 1.1E-02          |
| Basal transcription factors                 | Genetic information processing       | Transcription                       | 42          | 0.57      | 1.68       | 4.9E-03          | 1.3E-02          |
| Cytokine-cytokine receptor interaction      | Environmental information processing | Signaling molecules and interaction | 284         | 0.43      | 1.67       | 0.0E+00          | 1.5E-02          |
| Apoptosis                                   | Cellular processes                   | Cell growth and death               | 133         | 0.47      | 1.66       | 1.8E-04          | 1.6E-02          |
| Th17 cell differentiation                   | Organismal systems                   | Immune system                       | 105         | 0.48      | 1.65       | 5.6E-04          | 1.6E-02          |
| DNA replication                             | Genetic information processing       | Replication and repair              | 36          | 0.56      | 1.61       | 9.8E-03          | 2.4E-02          |
| Rig-I-like receptor signaling pathway       | Organismal systems                   | Immune system                       | 67          | 0.50      | 1.60       | 3.8E-03          | 2.8E-02          |
| MAPK signaling pathway                      | Environmental information processing | Signal transduction                 | 292         | 0.41      | 1.60       | 0.0E+00          | 2.7E-02          |
| Progesterone mediated oocyte maturation     | Organismal systems                   | Endocrine system                    | 93          | 0.47      | 1.59       | 4.7E-03          | 2.7E-02          |
| Nucleotide excision repair                  | Genetic information processing       | Replication and repair              | 43          | 0.54      | 1.59       | 1.1E-02          | 2.7E-02          |
| C-type lectin receptor signaling pathway    | Organismal systems                   | Immune system                       | 104         | 0.46      | 1.58       | 1.7E-03          | 2.8E-02          |
| Synaptic vesicle cycle                      | Organismal systems                   | Nervous system                      | 78          | 0.47      | 1.55       | 5.8E-03          | 3.5E-02          |

|                                                               |                                      |                                     |     |      |      |         |         |
|---------------------------------------------------------------|--------------------------------------|-------------------------------------|-----|------|------|---------|---------|
| Estrogen signaling pathway                                    | Environmental information processing | Signaling molecules and interaction | 136 | 0.43 | 1.54 | 1.8E-03 | 3.8E-02 |
| Hippo signaling pathway multiple species                      | Environmental information processing | Signal transduction                 | 28  | 0.57 | 1.54 | 2.0E-02 | 3.7E-02 |
| Autophagy other                                               | Cellular processes                   | Transport and catabolism            | 31  | 0.56 | 1.54 | 2.2E-02 | 3.7E-02 |
| Vasopressin regulated water reabsorption                      | Organismal systems                   | Excretory system                    | 44  | 0.51 | 1.53 | 2.2E-02 | 3.9E-02 |
| Th1 and Th2 cell differentiation                              | Organismal systems                   | Immune system                       | 90  | 0.45 | 1.51 | 7.8E-03 | 4.7E-02 |
| Collecting duct acid secretion                                | Organismal systems                   | Excretory system                    | 27  | 0.56 | 1.49 | 3.6E-02 | 5.1E-02 |
| RNA degradation                                               | Genetic information processing       | Folding, sorting and degradation    | 77  | 0.46 | 1.49 | 1.4E-02 | 5.2E-02 |
| Oocyte meiosis                                                | Cellular processes                   | Cell growth and death               | 119 | 0.42 | 1.48 | 6.3E-03 | 5.2E-02 |
| Ubiquitin mediated proteolysis                                | Genetic information processing       | Folding, sorting and degradation    | 136 | 0.41 | 1.48 | 4.6E-03 | 5.2E-02 |
| TGF-beta signaling pathway                                    | Environmental information processing | Signal transduction                 | 92  | 0.43 | 1.47 | 1.3E-02 | 5.9E-02 |
| Oxidative phosphorylation                                     | Metabolism                           | Energy metabolism                   | 115 | 0.41 | 1.44 | 1.3E-02 | 6.9E-02 |
| Adipocytokine signaling pathway                               | Organismal systems                   | Endocrine system                    | 68  | 0.44 | 1.43 | 2.8E-02 | 7.4E-02 |
| Endocytosis                                                   | Cellular processes                   | Transport and catabolism            | 242 | 0.37 | 1.42 | 3.4E-03 | 7.8E-02 |
| Jak- STAT signaling pathway                                   | Environmental information processing | Signal transduction                 | 158 | 0.39 | 1.41 | 1.1E-02 | 8.3E-02 |
| Cellular senescence                                           | Cellular processes                   | Cell growth and death               | 158 | 0.38 | 1.39 | 1.4E-02 | 9.3E-02 |
| Hippo signaling pathway                                       | Environmental information processing | Signal transduction                 | 150 | 0.38 | 1.39 | 1.3E-02 | 9.6E-02 |
| Viral protein interaction with cytokine and cytokine receptor | Environmental information processing | Signaling molecules and interaction | 96  | 0.40 | 1.38 | 3.0E-02 | 9.8E-02 |
| Phagosome                                                     | Cellular processes                   | Transport and catabolism            | 50  | 0.45 | 1.37 | 6.3E-02 | 1.1E-01 |
| Autophagy animal                                              | Cellular processes                   | Transport and catabolism            | 143 | 0.38 | 1.36 | 2.4E-02 | 1.1E-01 |
| Thermogenesis                                                 | Organismal systems                   | Environmental adaptation            | 211 | 0.35 | 1.33 | 2.1E-02 | 1.3E-01 |

**Supplementary Table S2. Downregulated pathways in Caco-2 cells cultured under dynamic culture conditions versus static culture conditions**

| KEGG pathway name                     | KEGG Category      | KEGG category subgroup                    | SIZE | ES    | NES   | NOM p-val | FDR q-val |
|---------------------------------------|--------------------|-------------------------------------------|------|-------|-------|-----------|-----------|
| Protein digestion and absorption      | Organismal systems | Digestive system                          | 83   | -0.66 | -2.23 | 0.0E+00   | 1.1E-04   |
| Carbohydrate digestion and absorption | Organismal systems | Digestive system                          | 39   | -0.75 | -2.19 | 0.0E+00   | 5.7E-05   |
| Fat digestion and absorption          | Organismal systems | Digestive system                          | 41   | -0.73 | -2.17 | 0.0E+00   | 3.8E-05   |
| Glycolysis gluconeogenesis            | Metabolism         | Carbohydrate metabolism                   | 68   | -0.63 | -2.05 | 0.0E+00   | 2.7E-04   |
| Vitamin digestion and bsorption       | Organismal systems | Digestive system                          | 23   | -0.76 | -2.00 | 0.0E+00   | 4.8E-04   |
| Carbon metabolism                     | Metabolism         | Global and overview maps                  | 114  | -0.57 | -2.00 | 0.0E+00   | 4.3E-04   |
| Drug metabolism cytochrome P450       | Metabolism         | Xenobiotics biodegradation and metabolism | 62   | -0.62 | -2.00 | 0.0E+00   | 4.4E-04   |
| Fatty acid degradation                | Metabolism         | Lipid metabolism                          | 43   | -0.65 | -1.98 | 0.0E+00   | 6.7E-04   |
| Cholesterol metabolism                | Organismal systems | Digestive system                          | 49   | -0.64 | -1.96 | 0.0E+00   | 7.9E-04   |
| Steroid biosynthesis                  | Metabolism         | Lipid metabolism                          | 18   | -0.79 | -1.96 | 2.1E-04   | 7.2E-04   |
| Butanoate metabolism                  | Metabolism         | Carbohydrate metabolism                   | 28   | -0.71 | -1.96 | 4.2E-04   | 6.9E-04   |
| Propanoate metabolism                 | Metabolism         | Carbohydrate metabolism                   | 33   | -0.69 | -1.95 | 2.1E-04   | 7.2E-04   |
| Starch and sucrose metabolism         | Metabolism         | Carbohydrate metabolism                   | 32   | -0.67 | -1.91 | 4.2E-04   | 1.3E-03   |

|                                                        |                                      |                                           |     |       |       |         |         |
|--------------------------------------------------------|--------------------------------------|-------------------------------------------|-----|-------|-------|---------|---------|
| Glycine serine and threonine metabolism                | Metabolism                           | Amino acid metabolism                     | 38  | -0.65 | -1.91 | 4.3E-04 | 1.4E-03 |
| Peroxisome                                             | Cellular processes                   | Transport and catabolism                  | 82  | -0.56 | -1.90 | 0.0E+00 | 1.4E-03 |
| Valine leucine and isoleucine degradation              | Metabolism                           | Amino acid metabolism                     | 47  | -0.62 | -1.88 | 4.2E-04 | 1.9E-03 |
| Pentose phosphate pathway                              | Metabolism                           | Carbohydrate metabolism                   | 30  | -0.67 | -1.87 | 6.4E-04 | 2.2E-03 |
| Histidine metabolism                                   | Metabolism                           | Amino acid metabolism                     | 23  | -0.71 | -1.87 | 1.1E-03 | 2.1E-03 |
| Complement and coagulation cascades                    | Organismal systems                   | Immune system                             | 77  | -0.56 | -1.86 | 2.1E-04 | 2.0E-03 |
| Biosynthesis of amino acids                            | Metabolism                           | Global and overview maps                  | 71  | -0.57 | -1.86 | 0.0E+00 | 2.2E-03 |
| Glyoxylate and dicarboxylate metabolism                | Metabolism                           | Carbohydrate metabolism                   | 29  | -0.67 | -1.85 | 1.5E-03 | 2.3E-03 |
| Primary bile acid biosynthesis                         | Metabolism                           | Lipid metabolism                          | 16  | -0.76 | -1.83 | 1.9E-03 | 3.2E-03 |
| Bile secretion                                         | Organismal systems                   | Digestive system                          | 71  | -0.54 | -1.79 | 6.4E-04 | 5.2E-03 |
| Tyrosine metabolism                                    | Metabolism                           | Amino acid metabolism                     | 36  | -0.61 | -1.77 | 1.5E-03 | 6.4E-03 |
| Sphingolipid metabolism                                | Metabolism                           | Lipid metabolism                          | 46  | -0.58 | -1.76 | 1.7E-03 | 6.9E-03 |
| Galactose metabolism                                   | Metabolism                           | Carbohydrate metabolism                   | 31  | -0.62 | -1.73 | 4.9E-03 | 8.8E-03 |
| PPAR signaling pathway                                 | Organismal systems                   | Endocrine system                          | 73  | -0.52 | -1.70 | 6.4E-04 | 1.2E-02 |
| Fructose and mannose metabolism                        | Metabolism                           | Carbohydrate metabolism                   | 32  | -0.60 | -1.69 | 4.6E-03 | 1.3E-02 |
| Proximal tubule bicarbonate reclamation                | Organismal systems                   | Excretory system                          | 22  | -0.64 | -1.66 | 8.9E-03 | 1.7E-02 |
| Nitrogen metabolism                                    | Metabolism                           | Energy metabolism                         | 16  | -0.69 | -1.66 | 1.1E-02 | 1.8E-02 |
| Inositol phosphate metabolism                          | Metabolism                           | Carbohydrate metabolism                   | 74  | -0.50 | -1.65 | 1.1E-03 | 2.0E-02 |
| Tryptophan metabolism                                  | Metabolism                           | Amino acid metabolism                     | 42  | -0.55 | -1.64 | 7.5E-03 | 2.0E-02 |
| Alanine, aspartate and glutamate metabolism            | Metabolism                           | Amino acid metabolism                     | 34  | -0.57 | -1.62 | 1.3E-02 | 2.4E-02 |
| Fatty acid metabolism                                  | Metabolism                           | Global and overview maps                  | 55  | -0.52 | -1.61 | 5.3E-03 | 2.5E-02 |
| Phosphatidylinositol signaling system                  | Environmental information processing | Signal transduction                       | 99  | -0.46 | -1.60 | 2.2E-03 | 2.9E-02 |
| Pancreatic secretion                                   | Organismal systems                   | Digestive system                          | 93  | -0.46 | -1.57 | 3.0E-03 | 3.7E-02 |
| Citrate cycle (TCA cycle)                              | Metabolism                           | Carbohydrate metabolism                   | 29  | -0.56 | -1.56 | 2.3E-02 | 3.8E-02 |
| Glucagon signaling pathway                             | Organismal systems                   | Endocrine system                          | 100 | -0.45 | -1.56 | 3.9E-03 | 3.7E-02 |
| Glycerolipid metabolism                                | Metabolism                           | Lipid metabolism                          | 61  | -0.49 | -1.55 | 8.2E-03 | 3.8E-02 |
| Glycerophospholipid metabolism                         | Metabolism                           | Lipid metabolism                          | 93  | -0.45 | -1.55 | 4.0E-03 | 4.0E-02 |
| Pyruvate metabolism                                    | Metabolism                           | Carbohydrate metabolism                   | 39  | -0.53 | -1.54 | 2.5E-02 | 3.9E-02 |
| Glycosaminoglycan biosynthesis-heparan sulfate/heparin | Metabolism                           | Glycan biosynthesis and metabolism        | 24  | -0.58 | -1.54 | 2.7E-02 | 4.1E-02 |
| Phenylalanine metabolism                               | Metabolism                           | Amino acid metabolism                     | 17  | -0.62 | -1.53 | 4.0E-02 | 4.3E-02 |
| Oxocarboxylic acid metabolism                          | Metabolism                           | Global and overview maps                  | 16  | -0.62 | -1.51 | 4.8E-02 | 4.8E-02 |
| Linoleic acid metabolism                               | Metabolism                           | Lipid metabolism                          | 25  | -0.56 | -1.50 | 3.9E-02 | 5.0E-02 |
| Alpha linolenic acid metabolism                        | Metabolism                           | Lipid metabolism                          | 22  | -0.57 | -1.50 | 4.4E-02 | 5.2E-02 |
| ABC transporters                                       | Environmental information processing | Membrane transport                        | 45  | -0.49 | -1.48 | 2.9E-02 | 5.8E-02 |
| Lysosome                                               | Cellular processes                   | Transport and catabolism                  | 122 | -0.41 | -1.48 | 9.3E-03 | 5.9E-02 |
| Arachidonic acid metabolism                            | Metabolism                           | Lipid metabolism                          | 58  | -0.47 | -1.47 | 2.3E-02 | 6.1E-02 |
| Drug metabolism other enzymes                          | Metabolism                           | Xenobiotics biodegradation and metabolism | 70  | -0.43 | -1.42 | 2.5E-02 | 8.5E-02 |
| Ether lipid metabolism                                 | Metabolism                           | Lipid metabolism                          | 44  | -0.47 | -1.42 | 4.5E-02 | 8.5E-02 |
| AMPK signaling pathway                                 | Environmental information processing | Signal transduction                       | 119 | -0.39 | -1.39 | 2.1E-02 | 9.9E-02 |
| Serotonergic synapse                                   | Organismal systems                   | Nervous system                            | 109 | -0.39 | -1.38 | 2.8E-02 | 1.1E-01 |

|                                         |                                      |                                     |     |       |       |         |         |
|-----------------------------------------|--------------------------------------|-------------------------------------|-----|-------|-------|---------|---------|
| Insulin secretion                       | Organismal systems                   | Endocrine system                    | 85  | -0.40 | -1.35 | 4.6E-02 | 1.3E-01 |
| cGMP-PKG signaling pathway              | Environmental information processing | Signal transduction                 | 164 | -0.35 | -1.29 | 3.8E-02 | 1.7E-01 |
| Neuroactive ligand-receptor interaction | Environmental information processing | Signaling molecules and interaction | 330 | -0.32 | -1.28 | 1.7E-02 | 1.8E-01 |

**Supplementary Table S3. References describing the function of genes in the top 10 most significantly up and downregulated genes**

| Genes    | Core function in cells                    | NCBI Database <sup>1</sup> | KEGG Pathway Database <sup>2</sup> | Publications |
|----------|-------------------------------------------|----------------------------|------------------------------------|--------------|
| MT1H     | Mineral absorption, Metal binding         | X                          | X                                  | [1-3]        |
| MT1G     | Mineral absorption, Metal binding         | X                          | X                                  | [1-3]        |
| ANXA1    | Anti-inflammation                         | X                          | X                                  | [4, 5]       |
| UGT1A1   | Metabolism                                | X                          | X                                  | [6-8]        |
| DHRS2    | Metabolism                                | X                          | X                                  | [9, 10]      |
| MT1X     | Mineral absorption, Metal binding         | X                          | X                                  | [1-3]        |
| IFITM3   | Immune system                             | X                          | X                                  | [11, 12]     |
| SLC16A6  | Membrane transporter                      | X                          | X                                  | [13, 14]     |
| UPK1B    | Cellular development and growth           | X                          | X                                  | [15]         |
| IFI27    | Immune system                             | X                          | NA                                 | [16-18]      |
| G6PC     | Metabolism                                | X                          | X                                  | [19, 20]     |
| ALDOB    | Metabolism                                | X                          | X                                  | [21-23]      |
| C17orf78 | unknown                                   | NA                         | NA                                 | -            |
| ASAH2    | Metabolism, Biosynthesis                  | X                          | X                                  | [24, 25]     |
| SI       | Metabolism, Digestion                     | X                          | X                                  | [26-28]      |
| S100G    | Mineral absorption, Membrane transporter  | X                          | X                                  | [29-31]      |
| CYP2C19  | Metabolism                                | X                          | X                                  | [32, 33]     |
| MTTP     | Lipid digestion and absorption            | X                          | X                                  | [34-36]      |
| TM4SF20  | Cell growth, proliferation and activities | X                          | NA                                 | [37, 38]     |
| NRN1     | Neurite outgrowth                         | X                          | NA                                 | [39, 40]     |

<sup>1</sup><https://www.ncbi.nlm.nih.gov/gene>

<sup>2</sup><https://www.genome.jp/kegg/genes.html>

1. Dziegiel, P., et al., *Metallothioneins in Normal and Cancer Cells*. Adv Anat Embryol Cell Biol, 2016. **218**: p. 1-117.
2. Subramanian Vignesh, K. and G.S. Deepe, Jr., *Metallothioneins: Emerging Modulators in Immunity and Infection*. Int J Mol Sci, 2017. **18**(10).
3. Cheng, Z.Q., et al., *Evaluation of metallothionein formation as a proxy for zinc absorption in an in vitro digestion/Caco-2 cell culture model*. Food & Function, 2012. **3**(7): p. 732-736.
4. Babbitt, B.A., et al., *Annexin A1 regulates intestinal mucosal injury, inflammation, and repair*. J Immunol, 2008. **181**(7): p. 5035-44.
5. Gavins, F.N.E. and M.J. Hickey, *Annexin A1 and the regulation of innate and adaptive immunity*. Frontiers in Immunology, 2012. **3**.
6. Mackenzie, P.I., D.G. Hu, and D.A. Gardner-Stephen, *The regulation of UDP-glucuronosyltransferase genes by tissue-specific and ligand-activated transcription factors*. Drug Metab Rev, 2010. **42**(1): p. 99-109.
7. Vaessen, S.F., et al., *Regional Expression Levels of Drug Transporters and Metabolizing Enzymes along the Pig and Human Intestinal Tract and Comparison with Caco-2 Cells*. Drug Metab Dispos, 2017. **45**(4): p. 353-360.
8. Paine, M.F. and M.B. Fisher, *Immunochemical identification of UGT isoforms in human small bowel and in caco-2 cell monolayers*. Biochem Biophys Res Commun, 2000. **273**(3): p. 1053-7.
9. Gabrielli, F. and S. Tofanelli, *Molecular and functional evolution of human DHRS2 and DHRS4 duplicated genes*. Gene, 2012. **511**(2): p. 461-9.
10. Luo, X., et al., *DHRS2 mediates cell growth inhibition induced by Trichothecin in nasopharyngeal carcinoma*. J Exp Clin Cancer Res, 2019. **38**(1): p. 300.
11. Gorman, M.J., et al., *The Interferon-Stimulated Gene Ifitm3 Restricts West Nile Virus Infection and Pathogenesis*. J Virol, 2016. **90**(18): p. 8212-25.
12. Feeley, E.M., et al., *IFITM3 inhibits influenza A virus infection by preventing cytosolic entry*. PLoS Pathog, 2011. **7**(10): p. e1002337.
13. Halestrap, A.P. and D. Meredith, *The SLC16 gene family-from monocarboxylate transporters (MCTs) to aromatic amino acid transporters and beyond*. Pflugers Arch, 2004. **447**(5): p. 619-28.
14. Perez-Escuredo, J., et al., *Monocarboxylate transporters in the brain and in cancer*. Biochim Biophys Acta, 2016. **1863**(10): p. 2481-97.
15. Carpenter, A.R., et al., *Uroplakin 1b is critical in urinary tract development and urothelial differentiation and homeostasis*. Kidney Int, 2016. **89**(3): p. 612-24.
16. Dooley, T.P., et al., *Regulation of gene expression in inflammatory bowel disease and correlation with IBD drugs: screening by DNA microarrays*. Inflamm Bowel Dis, 2004. **10**(1): p. 1-14.
17. Nagasawa, Y., et al., *IFI27 Is a Useful Genetic Marker for Diagnosis of Immunoglobulin A Nephropathy and Membranous Nephropathy Using Peripheral Blood*. Plos One, 2016. **11**(4).
18. Kraiczy, J., et al., *Genome-Wide Epigenetic and Transcriptomic Characterization of Human-Induced Pluripotent Stem Cell-Derived Intestinal Epithelial Organoids*. Cell Mol Gastroenterol Hepatol, 2019. **7**(2): p. 285-288.
19. Chou, J.Y. and B.C. Mansfield, *Mutations in the glucose-6-phosphatase-alpha (G6PC) gene that cause type Ia glycogen storage disease*. Human Mutation, 2008. **29**(7): p. 921-930.
20. Guo, T., et al., *Genetic and molecular analyses reveal G6PC as a key element connecting glucose metabolism and cell cycle control in ovarian cancer*. Tumor Biology, 2015. **36**(10): p. 7649-7658.
21. Chang, J., et al., *Proteomic changes during intestinal cell maturation in vivo*. J Proteomics, 2008. **71**(5): p. 530-46.
22. Chang, Y.C., et al., *Roles of Aldolase Family Genes in Human Cancers and Diseases*. Trends Endocrinol Metab, 2018. **29**(8): p. 549-559.
23. Eady, J.J., et al., *Differential effects of basolateral and apical iron supply on iron transport in Caco-2 cells*. Genes Nutr, 2015. **10**(3): p. 463.
24. Kono, M., et al., *Neutral ceramidase encoded by the Asah2 gene is essential for the intestinal degradation of sphingolipids*. J Biol Chem, 2006. **281**(11): p. 7324-31.
25. Zhu, D., et al., *Expression and regulation of enzymes in the ceramide metabolic pathway in human retinal pigment epithelial cells and their relevance to retinal degeneration*. Vision Res, 2010. **50**(7): p. 643-51.
26. Hoffman, L.R. and E.B. Chang, *Regional Expression and Regulation of Intestinal Sucrase-Isomaltase*. Journal of Nutritional Biochemistry, 1993. **4**(3): p. 130-142.
27. Inoue, S., K. Mochizuki, and T. Goda, *Jejunal induction of SI and SGLT1 genes in rats by high-starch/low-fat diet is associated with histone acetylation and binding of GCN5 on the genes*. J Nutr Sci Vitaminol (Tokyo), 2011. **57**(2): p. 162-9.
28. Gericke, B., M. Amiri, and H.Y. Naim, *The multiple roles of sucrase-isomaltase in the intestinal physiology*. Mol Cell Pediatr, 2016. **3**(1): p. 2.
29. Hulst, M., et al., *Enrichment of in vivo transcription data from dietary intervention studies with in vitro data provides improved insight into gene regulation mechanisms in the intestinal mucosa*. Genes Nutr, 2017. **12**: p. 11.
30. Choi, K.C. and E.B. Jeung, *Molecular mechanism of regulation of the calcium-binding protein calbindin-D9k, and its physiological role(s) in mammals: a review of current research*. J Cell Mol Med, 2008. **12**(2): p. 409-20.
31. Ishiguro, K., et al., *S100G expression and function in fibroblasts on colitis induction*. Int Immunopharmacol, 2016. **39**: p. 92-96.
32. Galetin, A. and J.B. Houston, *Intestinal and hepatic metabolic activity of five cytochrome P450 enzymes: impact on prediction of first-pass metabolism*. J Pharmacol Exp Ther, 2006. **318**(3): p. 1220-9.
33. Hosohata, K., et al., *Impact of intestinal CYP2C19 genotypes on the interaction between tacrolimus and omeprazole, but not lansoprazole, in adult living-donor liver transplant patients*. Drug Metab Dispos, 2009. **37**(4): p. 821-6.
34. Xie, Y., et al., *Compensatory increase in hepatic lipogenesis in mice with conditional intestine-specific Mttp deficiency*. J Biol Chem, 2006. **281**(7): p. 4075-86.
35. Hussain, M.M., N. Nijstad, and L. Franceschini, *Regulation of microsomal triglyceride transfer protein*. Clin Lipidol, 2011. **6**(3): p. 293-303.
36. Liu, Y., et al., *Lack of MTP Activity in Pluripotent Stem Cell-Derived Hepatocytes and Cardiomyocytes Abolishes apoB Secretion and Increases Cell Stress*. Cell Rep, 2017. **19**(7): p. 1456-1466.
37. Chen, Q., et al., *Sustained induction of collagen synthesis by TGF-beta requires regulated intramembrane proteolysis of CREB3L1*. PLoS One, 2014. **9**(10): p. e108528.
38. Denard, B., et al., *Ceramide Induced Regulated Alternative Translocation of TM4SF20 and Beyond*. Faseb Journal, 2017. **31**.
39. Gao, R., et al., *MIR-204 promotes apoptosis in oxidative stress-induced rat Schwann cells by suppressing neuritin expression*. FEBS Lett, 2014. **588**(17): p. 3225-32.
40. Feng, Y.A., T.E. Liu, and Y. Wu, *microRNA-182 inhibits the proliferation and migration of glioma cells through the induction of neuritin expression*. Oncol Lett, 2015. **10**(2): p. 1197-1203.

**Supplementary Table S4. The names of the 575 genes that were visualized in Figure 4**

| <b>ENTREZID</b> | <b>SYMBOL</b> | <b>GENENAME</b>                                         |
|-----------------|---------------|---------------------------------------------------------|
| 3315            | HSPB1         | heat shock protein family B (small) member 1            |
| 2316            | FLNA          | filamin A                                               |
| 6237            | RRAS          | RAS related                                             |
| 4804            | NGFR          | nerve growth factor receptor                            |
| 2318            | FLNC          | filamin C                                               |
| 4616            | GADD45B       | growth arrest and DNA damage inducible beta             |
| 374             | AREG          | amphiregulin                                            |
| 1326            | MAP3K8        | mitogen-activated protein kinase kinase kinase 8        |
| 4254            | KITLG         | KIT ligand                                              |
| 4791            | NFKB2         | nuclear factor kappa B subunit 2                        |
| 1847            | DUSP5         | dual specificity phosphatase 5                          |
| 1843            | DUSP1         | dual specificity phosphatase 1                          |
| 3303            | HSPA1A        | heat shock protein family A (Hsp70) member 1A           |
| 3164            | NR4A1         | nuclear receptor subfamily 4 group A member 1           |
| 3725            | JUN           | Jun proto-oncogene, AP-1 transcription factor subunit   |
| 1849            | DUSP7         | dual specificity phosphatase 7                          |
| 1649            | DDIT3         | DNA damage inducible transcript 3                       |
| 3312            | HSPA8         | heat shock protein family A (Hsp70) member 8            |
| 9020            | MAP3K14       | mitogen-activated protein kinase kinase kinase 14       |
| 1969            | EPHA2         | EPH receptor A2                                         |
| 5536            | PPP5C         | protein phosphatase 5 catalytic subunit                 |
| 3304            | HSPA1B        | heat shock protein family A (Hsp70) member 1B           |
| 9064            | MAP3K6        | mitogen-activated protein kinase kinase kinase 6        |
| 5922            | RASA2         | RAS p21 protein activator 2                             |
| 9448            | MAP4K4        | mitogen-activated protein kinase kinase kinase kinase 4 |
| 11221           | DUSP10        | dual specificity phosphatase 10                         |
| 2317            | FLNB          | filamin B                                               |
| 5604            | MAP2K1        | mitogen-activated protein kinase kinase 1               |
| 1435            | CSF1          | colony stimulating factor 1                             |
| 5970            | RELA          | RELA proto-oncogene, NF-kB subunit                      |
| 7040            | TGFB1         | transforming growth factor beta 1                       |
| 1846            | DUSP4         | dual specificity phosphatase 4                          |
| 5871            | MAP4K2        | mitogen-activated protein kinase kinase kinase kinase 2 |
| 1436            | CSF1R         | colony stimulating factor 1 receptor                    |
| 2069            | EREG          | epiregulin                                              |
| 8605            | PLA2G4C       | phospholipase A2 group IVC                              |
| 2260            | FGFR1         | fibroblast growth factor receptor 1                     |
| 7124            | TNF           | tumor necrosis factor                                   |
| 7042            | TGFB2         | transforming growth factor beta 2                       |
| 8817            | FGF18         | fibroblast growth factor 18                             |
| 5971            | RELB          | RELB proto-oncogene, NF-kB subunit                      |
| 5062            | PAK2          | p21 (RAC1) activated kinase 2                           |
| 994             | CDC25B        | cell division cycle 25B                                 |
| 27092           | CACNG4        | calcium voltage-gated channel auxiliary subunit gamma 4 |
| 1848            | DUSP6         | dual specificity phosphatase 6                          |
| 1844            | DUSP2         | dual specificity phosphatase 2                          |
| 6788            | STK3          | serine/threonine kinase 3                               |
| 4214            | MAP3K1        | mitogen-activated protein kinase kinase kinase 1        |
| 3480            | IGF1R         | insulin like growth factor 1 receptor                   |

|        |         |                                                            |
|--------|---------|------------------------------------------------------------|
| 4215   | MAP3K3  | mitogen-activated protein kinase kinase kinase 3           |
| 7048   | TGFBR2  | transforming growth factor beta receptor 2                 |
| 5155   | PDGFB   | platelet derived growth factor subunit B                   |
| 4208   | MEF2C   | myocyte enhancer factor 2C                                 |
| 6722   | SRF     | serum response factor                                      |
| 1147   | CHUK    | conserved helix-loop-helix ubiquitous kinase               |
| 255189 | PLA2G4F | phospholipase A2 group IVF                                 |
| 2321   | FLT1    | fms related tyrosine kinase 1                              |
| 1647   | GADD45A | growth arrest and DNA damage inducible alpha               |
| 25780  | RASGRP3 | RAS guanyl releasing protein 3                             |
| 4790   | NFKB1   | nuclear factor kappa B subunit 1                           |
| 7186   | TRAF2   | TNF receptor associated factor 2                           |
| 8986   | RPS6KA4 | ribosomal protein S6 kinase A4                             |
| 207    | AKT1    | AKT serine/threonine kinase 1                              |
| 57551  | TAOK1   | TAO kinase 1                                               |
| 5534   | PPP3R1  | protein phosphatase 3 regulatory subunit B, alpha          |
| 9175   | MAP3K13 | mitogen-activated protein kinase kinase kinase 13          |
| 3554   | IL1R1   | interleukin 1 receptor type 1                              |
| 51701  | NLK     | nemo like kinase                                           |
| 6300   | MAPK12  | mitogen-activated protein kinase 12                        |
| 1616   | DAXX    | death domain associated protein                            |
| 1845   | DUSP3   | dual specificity phosphatase 3                             |
| 10912  | GADD45G | growth arrest and DNA damage inducible gamma               |
| 836    | CASP3   | caspase 3                                                  |
| 5923   | RASGRF1 | Ras protein specific guanine nucleotide releasing factor 1 |
| 51135  | IRAK4   | interleukin 1 receptor associated kinase 4                 |
| 5908   | RAP1B   | RAP1B, member of RAS oncogene family                       |
| 1956   | EGFR    | epidermal growth factor receptor                           |
| 5567   | PRKACB  | protein kinase cAMP-activated catalytic subunit beta       |
| 5578   | PRKCA   | protein kinase C alpha                                     |
| 3625   | INHBB   | inhibin subunit beta B                                     |
| 26585  | GREM1   | gremlin 1, DAN family BMP antagonist                       |
| 654    | BMP6    | bone morphogenetic protein 6                               |
| 90     | ACVR1   | activin A receptor type 1                                  |
| 655    | BMP7    | bone morphogenetic protein 7                               |
| 57154  | SMURF1  | SMAD specific E3 ubiquitin protein ligase 1                |
| 7057   | THBS1   | thrombospondin 1                                           |
| 3399   | ID3     | inhibitor of DNA binding 3, HLH protein                    |
| 3397   | ID1     | inhibitor of DNA binding 1, HLH protein                    |
| 1874   | E2F4    | E2F transcription factor 4                                 |
| 7050   | TGIF1   | TGFB induced factor homeobox 1                             |
| 25805  | BAMBI   | BMP and activin membrane bound inhibitor                   |
| 5516   | PPP2CB  | protein phosphatase 2 catalytic subunit beta               |
| 64750  | SMURF2  | SMAD specific E3 ubiquitin protein ligase 2                |
| 2033   | EP300   | E1A binding protein p300                                   |
| 4052   | LTBP1   | latent transforming growth factor beta binding protein 1   |
| 5515   | PPP2CA  | protein phosphatase 2 catalytic subunit alpha              |
| 6198   | RPS6KB1 | ribosomal protein S6 kinase B1                             |
| 4089   | SMAD4   | SMAD family member 4                                       |
| 4170   | MCL1    | MCL1, BCL2 family apoptosis regulator                      |
| 3459   | IFNGR1  | interferon gamma receptor 1                                |



|        |         |                                                                        |
|--------|---------|------------------------------------------------------------------------|
| 3455   | IFNAR2  | interferon alpha and beta receptor subunit 2                           |
| 2475   | MTOR    | mechanistic target of rapamycin kinase                                 |
| 3953   | LEPR    | leptin receptor                                                        |
| 3566   | IL4R    | interleukin 4 receptor                                                 |
| 3572   | IL6ST   | interleukin 6 signal transducer                                        |
| 9021   | SOCS3   | suppressor of cytokine signaling 3                                     |
| 6774   | STAT3   | signal transducer and activator of transcription 3                     |
| 53833  | IL20RB  | interleukin 20 receptor subunit beta                                   |
| 10254  | STAM2   | signal transducing adaptor molecule 2                                  |
| 3977   | LIFR    | LIF receptor alpha                                                     |
| 51561  | IL23A   | interleukin 23 subunit alpha                                           |
| 3717   | JAK2    | Janus kinase 2                                                         |
| 3976   | LIF     | LIF, interleukin 6 family cytokine                                     |
| 3563   | IL3RA   | interleukin 3 receptor subunit alpha                                   |
| 10379  | IRF9    | interferon regulatory factor 9                                         |
| 6776   | STAT5A  | signal transducer and activator of transcription 5A                    |
| 8651   | SOCS1   | suppressor of cytokine signaling 1                                     |
| 6772   | STAT1   | signal transducer and activator of transcription 1                     |
| 3561   | IL2RG   | interleukin 2 receptor subunit gamma                                   |
| 3601   | IL15RA  | interleukin 15 receptor subunit alpha                                  |
| 598    | BCL2L1  | BCL2 like 1                                                            |
| 6773   | STAT2   | signal transducer and activator of transcription 2                     |
| 1438   | CSF2RA  | colony stimulating factor 2 receptor alpha subunit                     |
| 3589   | IL11    | interleukin 11                                                         |
| 3567   | IL5     | interleukin 5                                                          |
| 1271   | CNTFR   | ciliary neurotrophic factor receptor                                   |
| 8835   | SOCS2   | suppressor of cytokine signaling 2                                     |
| 3716   | JAK1    | Janus kinase 1                                                         |
| 282618 | IFNL1   | interferon lambda 1                                                    |
| 1154   | CISH    | cytokine inducible SH2 containing protein                              |
| 5771   | PTPN2   | protein tyrosine phosphatase, non-receptor type 2                      |
| 5290   | PIK3CA  | phosphatidylinositol-4,5-bisphosphate 3-kinase catalytic subunit alpha |
| 595    | CCND1   | cyclin D1                                                              |
| 2885   | GRB2    | growth factor receptor bound protein 2                                 |
| 4609   | MYC     | MYC proto-oncogene, bHLH transcription factor                          |
| 3595   | IL12RB2 | interleukin 12 receptor subunit beta 2                                 |
| 282617 | IFNL3   | interferon lambda 3                                                    |
| 896    | CCND3   | cyclin D3                                                              |
| 5894   | RAF1    | Raf-1 proto-oncogene, serine/threonine kinase                          |
| 3588   | IL10RB  | interleukin 10 receptor subunit beta                                   |
| 2689   | GH2     | growth hormone 2                                                       |
| 8027   | STAM    | signal transducing adaptor molecule                                    |
| 7297   | TYK2    | tyrosine kinase 2                                                      |
| 9306   | SOCS6   | suppressor of cytokine signaling 6                                     |
| 3592   | IL12A   | interleukin 12A                                                        |
| 3383   | ICAM1   | intercellular adhesion molecule 1                                      |
| 330    | BIRC3   | baculoviral IAP repeat containing 3                                    |
| 5743   | PTGS2   | prostaglandin-endoperoxide synthase 2                                  |
| 1540   | CYLD    | CYLD lysine 63 deubiquitinase                                          |
| 5328   | PLAU    | plasminogen activator, urokinase                                       |
| 4792   | NFKBIA  | NFKB inhibitor alpha                                                   |

|        |          |                                                                          |
|--------|----------|--------------------------------------------------------------------------|
| 4050   | LTB      | lymphotoxin beta                                                         |
| 7706   | TRIM25   | tripartite motif containing 25                                           |
| 5588   | PRKCQ    | protein kinase C theta                                                   |
| 7128   | TNFAIP3  | TNF alpha induced protein 3                                              |
| 1896   | EDA      | ectodysplasin A                                                          |
| 7188   | TRAF5    | TNF receptor associated factor 5                                         |
| 7329   | UBE2I    | ubiquitin conjugating enzyme E2 I                                        |
| 8915   | BCL10    | B cell CLL/lymphoma 10                                                   |
| 4067   | LYN      | LYN proto-oncogene, Src family tyrosine kinase                           |
| 142    | PARP1    | poly(ADP-ribose) polymerase 1                                            |
| 3929   | LBP      | lipopolysaccharide binding protein                                       |
| 1906   | EDN1     | endothelin 1                                                             |
| 3726   | JUNB     | JunB proto-oncogene, AP-1 transcription factor subunit                   |
| 182    | JAG1     | jagged 1                                                                 |
| 7133   | TNFRSF1B | TNF receptor superfamily member 1B                                       |
| 10488  | CREB3    | cAMP responsive element binding protein 3                                |
| 3659   | IRF1     | interferon regulatory factor 1                                           |
| 192111 | PGAM5    | PGAM family member 5, mitochondrial serine/threonine protein phosphatase |
| 3627   | CXCL10   | C-X-C motif chemokine ligand 10                                          |
| 6352   | CCL5     | C-C motif chemokine ligand 5                                             |
| 6364   | CCL20    | C-C motif chemokine ligand 20                                            |
| 2919   | CXCL1    | C-X-C motif chemokine ligand 1                                           |
| 10059  | DNM1L    | dynamamin 1 like                                                         |
| 90993  | CREB3L1  | cAMP responsive element binding protein 3 like 1                         |
| 197259 | MLKL     | mixed lineage kinase domain like pseudokinase                            |
| 4318   | MMP9     | matrix metalloproteinase 9                                               |
| 9586   | CREB5    | cAMP responsive element binding protein 5                                |
| 1051   | CEBPB    | CCAAT enhancer binding protein beta                                      |
| 843    | CASP10   | caspase 10                                                               |
| 8737   | RIPK1    | receptor interacting serine/threonine kinase 1                           |
| 7533   | YWHAH    | tyrosine 3-monooxygenase/tryptophan 5-monooxygenase activation protein 4 |
| 898    | CCNE1    | cyclin E1                                                                |
| 9134   | CCNE2    | cyclin E2                                                                |
| 8697   | CDC23    | cell division cycle 23                                                   |
| 2810   | SFN      | stratifin                                                                |
| 9184   | BUB3     | BUB3, mitotic checkpoint protein                                         |
| 25847  | ANAPC13  | anaphase promoting complex subunit 13                                    |
| 7532   | YWHAG    | tyrosine 3-monooxygenase/tryptophan 5-monooxygenase activation protein 3 |
| 2932   | GSK3B    | glycogen synthase kinase 3 beta                                          |
| 51434  | ANAPC7   | anaphase promoting complex subunit 7                                     |
| 5111   | PCNA     | proliferating cell nuclear antigen                                       |
| 7465   | WEE1     | WEE1 G2 checkpoint kinase                                                |
| 5001   | ORC5     | origin recognition complex subunit 5                                     |
| 23595  | ORC3     | origin recognition complex subunit 3                                     |
| 991    | CDC20    | cell division cycle 20                                                   |
| 990    | CDC6     | cell division cycle 6                                                    |
| 8243   | SMC1A    | structural maintenance of chromosomes 1A                                 |
| 9088   | PKMYT1   | protein kinase, membrane associated tyrosine/threonine 1                 |
| 4085   | MAD2L1   | mitotic arrest deficient 2 like 1                                        |
| 4173   | MCM4     | minichromosome maintenance complex component 4                           |
| 993    | CDC25A   | cell division cycle 25A                                                  |

|        |           |                                                                        |
|--------|-----------|------------------------------------------------------------------------|
| 545    | ATR       | ATR serine/threonine kinase                                            |
| 10393  | ANAPC10   | anaphase promoting complex subunit 10                                  |
| 1022   | CDK7      | cyclin dependent kinase 7                                              |
| 891    | CCNB1     | cyclin B1                                                              |
| 699    | BUB1      | BUB1 mitotic checkpoint serine/threonine kinase                        |
| 10926  | DBF4      | DBF4 zinc finger                                                       |
| 7529   | YWHAB     | tyrosine 3-monooxygenase/tryptophan 5-monooxygenase activation protein |
| 996    | CDC27     | cell division cycle 27                                                 |
| 1871   | E2F3      | E2F transcription factor 3                                             |
| 5591   | PRKDC     | protein kinase, DNA-activated, catalytic subunit                       |
| 1021   | CDK6      | cyclin dependent kinase 6                                              |
| 983    | CDK1      | cyclin dependent kinase 1                                              |
| 1028   | CDKN1C    | cyclin dependent kinase inhibitor 1C                                   |
| 7272   | TTK       | TTK protein kinase                                                     |
| 9133   | CCNB2     | cyclin B2                                                              |
| 246184 | CDC26     | cell division cycle 26                                                 |
| 5347   | PLK1      | polo like kinase 1                                                     |
| 1032   | CDKN2D    | cyclin dependent kinase inhibitor 2D                                   |
| 23594  | ORC6      | origin recognition complex subunit 6                                   |
| 1869   | E2F1      | E2F transcription factor 1                                             |
| 29945  | ANAPC4    | anaphase promoting complex subunit 4                                   |
| 1030   | CDKN2B    | cyclin dependent kinase inhibitor 2B                                   |
| 10274  | STAG1     | stromal antigen 1                                                      |
| 10459  | MAD2L2    | mitotic arrest deficient 2 like 2                                      |
| 4176   | MCM7      | minichromosome maintenance complex component 7                         |
| 8318   | CDC45     | cell division cycle 45                                                 |
| 6500   | SKP1      | S-phase kinase associated protein 1                                    |
| 10744  | PTTG2     | pituitary tumor-transforming 2                                         |
| 701    | BUB1B     | BUB1 mitotic checkpoint serine/threonine kinase B                      |
| 1019   | CDK4      | cyclin dependent kinase 4                                              |
| 5366   | PMAIP1    | phorbol-12-myristate-13-acetate-induced protein 1                      |
| 1965   | EIF2S1    | eukaryotic translation initiation factor 2 subunit alpha               |
| 2081   | ERN1      | endoplasmic reticulum to nucleus signaling 1                           |
| 9451   | EIF2AK3   | eukaryotic translation initiation factor 2 alpha kinase 3              |
| 8795   | TNFRSF10B | TNF receptor superfamily member 10b                                    |
| 1520   | CTSS      | cathepsin S                                                            |
| 6709   | SPTAN1    | spectrin alpha, non-erythrocytic 1                                     |
| 1514   | CTSL      | cathepsin L                                                            |
| 84823  | LMNB2     | lamin B2                                                               |
| 56616  | DIABLO    | diablo IAP-binding mitochondrial protein                               |
| 10038  | PARP2     | poly(ADP-ribose) polymerase 2                                          |
| 637    | BID       | BH3 interacting domain death agonist                                   |
| 7277   | TUBA4A    | tubulin alpha 4a                                                       |
| 4000   | LMNA      | lamin A/C                                                              |
| 824    | CAPN2     | calpain 2                                                              |
| 842    | CASP9     | caspase 9                                                              |
| 3708   | ITPR1     | inositol 1,4,5-trisphosphate receptor type 1                           |
| 51807  | TUBA8     | tubulin alpha 8                                                        |
| 1515   | CTSV      | cathepsin V                                                            |
| 27113  | BBC3      | BCL2 binding component 3                                               |
| 5599   | MAPK8     | mitogen-activated protein kinase 8                                     |

|        |          |                                                                |
|--------|----------|----------------------------------------------------------------|
| 332    | BIRC5    | baculoviral IAP repeat containing 5                            |
| 7846   | TUBA1A   | tubulin alpha 1a                                               |
| 1676   | DFFA     | DNA fragmentation factor subunit alpha                         |
| 113457 | TUBA3D   | tubulin alpha 3d                                               |
| 71     | ACTG1    | actin gamma 1                                                  |
| 839    | CASP6    | caspase 6                                                      |
| 1512   | CTSH     | cathepsin H                                                    |
| 1508   | CTSB     | cathepsin B                                                    |
| 8878   | SQSTM1   | sequestosome 1                                                 |
| 2512   | FTL      | ferritin light chain                                           |
| 5834   | PYGB     | glycogen phosphorylase B                                       |
| 834    | CASP1    | caspase 1                                                      |
| 5481   | PPID     | peptidylprolyl isomerase D                                     |
| 3326   | HSP90AB1 | heat shock protein 90 alpha family class B member 1            |
| 9825   | SPATA2   | spermatogenesis associated 2                                   |
| 11124  | FAF1     | Fas associated factor 1                                        |
| 3320   | HSP90AA1 | heat shock protein 90 alpha family class A member 1            |
| 51510  | CHMP5    | charged multivesicular body protein 5                          |
| 291    | SLC25A4  | solute carrier family 25 member 4                              |
| 27183  | VPS4A    | vacuolar protein sorting 4 homolog A                           |
| 5610   | EIF2AK2  | eukaryotic translation initiation factor 2 alpha kinase 2      |
| 91782  | CHMP7    | charged multivesicular body protein 7                          |
| 29082  | CHMP4A   | charged multivesicular body protein 4A                         |
| 7419   | VDAC3    | voltage dependent anion channel 3                              |
| 55072  | RNF31    | ring finger protein 31                                         |
| 3552   | IL1A     | interleukin 1 alpha                                            |
| 81030  | ZBP1     | Z-DNA binding protein 1                                        |
| 5054   | SERPINE1 | serpin family E member 1                                       |
| 55240  | STEAP3   | STEAP3 metalloreductase                                        |
| 9538   | EI24     | EI24, autophagy associated transmembrane protein               |
| 3486   | IGFBP3   | insulin like growth factor binding protein 3                   |
| 3732   | CD82     | CD82 molecule                                                  |
| 51246  | SHISA5   | shisa family member 5                                          |
| 6241   | RRM2     | ribonucleotide reductase regulatory subunit M2                 |
| 50484  | RRM2B    | ribonucleotide reductase regulatory TP53 inducible subunit M2B |
| 92344  | GORAB    | golgin, RAB6 interacting                                       |
| 901    | CCNG2    | cyclin G2                                                      |
| 2113   | ETS1     | ETS proto-oncogene 1, transcription factor                     |
| 90550  | MCU      | mitochondrial calcium uniporter                                |
| 677    | ZFP36L1  | ZFP36 ring finger protein like 1                               |
| 4683   | NBN      | nibrin                                                         |
| 91750  | LIN52    | lin-52 DREAM MuvB core complex component                       |
| 5499   | PPP1CA   | protein phosphatase 1 catalytic subunit alpha                  |
| 3133   | HLA-E    | major histocompatibility complex, class I, E                   |
| 144715 | RAD9B    | RAD9 checkpoint clamp component B                              |
| 55957  | LIN37    | lin-37 DREAM MuvB core complex component                       |
| 4361   | MRE11    | MRE11 homolog, double strand break repair nuclease             |
| 23411  | SIRT1    | sirtuin 1                                                      |
| 3106   | HLA-B    | major histocompatibility complex, class I, B                   |
| 286826 | LIN9     | lin-9 DREAM MuvB core complex component                        |
| 3105   | HLA-A    | major histocompatibility complex, class I, A                   |

|        |         |                                                        |
|--------|---------|--------------------------------------------------------|
| 9110   | MTMR4   | myotubularin related protein 4                         |
| 1606   | DGKA    | diacylglycerol kinase alpha                            |
| 253430 | IPMK    | inositol polyphosphate multikinase                     |
| 23236  | PLCB1   | phospholipase C beta 1                                 |
| 5295   | PIK3R1  | phosphoinositide-3-kinase regulatory subunit 1         |
| 54928  | IMPAD1  | inositol monophosphatase domain containing 1           |
| 5331   | PLCB3   | phospholipase C beta 3                                 |
| 8760   | CDS2    | CDP-diacylglycerol synthase 2                          |
| 1040   | CDS1    | CDP-diacylglycerol synthase 1                          |
| 3613   | IMPA2   | inositol monophosphatase 2                             |
| 27124  | INPP5J  | inositol polyphosphate-5-phosphatase J                 |
| 8821   | INPP4B  | inositol polyphosphate-4-phosphatase type II B         |
| 10423  | CDIPT   | CDP-diacylglycerol--inositol 3-phosphatidyltransferase |
| 91860  | CALML4  | calmodulin like 4                                      |
| 3705   | ITPK1   | inositol-tetrakisphosphate 1-kinase                    |
| 5296   | PIK3R2  | phosphoinositide-3-kinase regulatory subunit 2         |
| 51447  | IP6K2   | inositol hexakisphosphate kinase 2                     |
| 4534   | MTM1    | myotubularin 1                                         |
| 3632   | INPP5A  | inositol polyphosphate-5-phosphatase A                 |
| 55300  | PI4K2B  | phosphatidylinositol 4-kinase type 2 beta              |
| 8395   | PIP5K1B | phosphatidylinositol-4-phosphate 5-kinase type 1 beta  |
| 5298   | PI4KB   | phosphatidylinositol 4-kinase beta                     |
| 5335   | PLCG1   | phospholipase C gamma 1                                |
| 23262  | PPIP5K2 | diphosphoinositol pentakisphosphate kinase 2           |
| 8396   | PIP4K2B | phosphatidylinositol-5-phosphate 4-kinase type 2 beta  |
| 55613  | MTMR8   | myotubularin related protein 8                         |
| 3636   | INPPL1  | inositol polyphosphate phosphatase like 1              |
| 3633   | INPP5B  | inositol polyphosphate-5-phosphatase B                 |
| 51196  | PLCE1   | phospholipase C epsilon 1                              |
| 22908  | SACM1L  | SAC1 like phosphatidylinositide phosphatase            |
| 2538   | G6PC    | glucose-6-phosphatase catalytic subunit                |
| 2203   | FBP1    | fructose-bisphosphatase 1                              |
| 5210   | PFKFB4  | 6-phosphofructo-2-kinase/fructose-2,6-biphosphatase 4  |
| 3172   | HNF4A   | hepatocyte nuclear factor 4 alpha                      |
| 5211   | PFKL    | phosphofructokinase, liver type                        |
| 1938   | EEF2    | eukaryotic translation elongation factor 2             |
| 5207   | PFKFB1  | 6-phosphofructo-2-kinase/fructose-2,6-biphosphatase 1  |
| 3643   | INSR    | insulin receptor                                       |
| 2997   | GYS1    | glycogen synthase 1                                    |
| 5523   | PPP2R3A | protein phosphatase 2 regulatory subunit B'alpha       |
| 5106   | PCK2    | phosphoenolpyruvate carboxykinase 2, mitochondrial     |
| 5563   | PRKAA2  | protein kinase AMP-activated catalytic subunit alpha 2 |
| 5468   | PPARG   | peroxisome proliferator activated receptor gamma       |
| 2998   | GYS2    | glycogen synthase 2                                    |
| 5105   | PCK1    | phosphoenolpyruvate carboxykinase 1                    |
| 10645  | CAMKK2  | calcium/calmodulin dependent protein kinase kinase 2   |
| 32     | ACACB   | acetyl-CoA carboxylase beta                            |
| 2308   | FOXO1   | forkhead box O1                                        |
| 5562   | PRKAA1  | protein kinase AMP-activated catalytic subunit alpha 1 |
| 55437  | STRADB  | STE20-related kinase adaptor beta                      |
| 5213   | PFKM    | phosphofructokinase, muscle                            |

|        |           |                                                           |
|--------|-----------|-----------------------------------------------------------|
| 23216  | TBC1D1    | TBC1 domain family member 1                               |
| 1080   | CFTR      | cystic fibrosis transmembrane conductance regulator       |
| 6319   | SCD       | stearoyl-CoA desaturase                                   |
| 79966  | SCD5      | stearoyl-CoA desaturase 5                                 |
| 11031  | RAB31     | RAB31, member RAS oncogene family                         |
| 30846  | EHD2      | EH domain containing 2                                    |
| 1213   | CLTC      | clathrin heavy chain                                      |
| 163    | AP2B1     | adaptor related protein complex 2 subunit beta 1          |
| 10890  | RAB10     | RAB10, member RAS oncogene family                         |
| 55738  | ARFGAP1   | ADP ribosylation factor GTPase activating protein 1       |
| 10095  | ARPC1B    | actin related protein 2/3 complex subunit 1B              |
| 79720  | VPS37B    | VPS37B, ESCRT-I subunit                                   |
| 2348   | FOLR1     | folate receptor 1                                         |
| 30844  | EHD4      | EH domain containing 4                                    |
| 23527  | ACAP2     | ArfGAP with coiled-coil, ankyrin repeat and PH domains 2  |
| 84313  | VPS25     | vacuolar protein sorting 25 homolog                       |
| 11311  | VPS45     | vacuolar protein sorting 45 homolog                       |
| 51100  | SH3GLB1   | SH3 domain containing GRB2 like, endophilin B1            |
| 10094  | ARPC3     | actin related protein 2/3 complex subunit 3               |
| 11267  | SNF8      | SNF8, ESCRT-II complex subunit                            |
| 387680 | WASHC2A   | WASH complex subunit 2A                                   |
| 10552  | ARPC1A    | actin related protein 2/3 complex subunit 1A              |
| 137492 | VPS37A    | VPS37A, ESCRT-I subunit                                   |
| 8853   | ASAP2     | ArfGAP with SH3 domain, ankyrin repeat and PH domain 2    |
| 375    | ARF1      | ADP ribosylation factor 1                                 |
| 80223  | RAB11FIP1 | RAB11 family interacting protein 1                        |
| 2352   | FOLR3     | folate receptor 3                                         |
| 8724   | SNX3      | sorting nexin 3                                           |
| 253725 | WASHC2C   | WASH complex subunit 2C                                   |
| 22905  | EPN2      | epsin 2                                                   |
| 160    | AP2A1     | adaptor related protein complex 2 subunit alpha 1         |
| 9559   | VPS26A    | VPS26, retromer complex component A                       |
| 81873  | ARPC5L    | actin related protein 2/3 complex subunit 5 like          |
| 55616  | ASAP3     | ArfGAP with SH3 domain, ankyrin repeat and PH domain 3    |
| 857    | CAV1      | caveolin 1                                                |
| 4218   | RAB8A     | RAB8A, member RAS oncogene family                         |
| 116984 | ARAP2     | ArfGAP with RhoGAP domain, ankyrin repeat and PH domain 2 |
| 829    | CAPZA1    | capping actin protein of muscle Z-line subunit alpha 1    |
| 867    | CBL       | Cbl proto-oncogene                                        |
| 5371   | PML       | promyelocytic leukemia                                    |
| 1211   | CLTA      | clathrin light chain A                                    |
| 3800   | KIF5C     | kinesin family member 5C                                  |
| 9265   | CYTH3     | cytohesin 3                                               |
| 3949   | LDLR      | low density lipoprotein receptor                          |
| 30845  | EHD3      | EH domain containing 3                                    |
| 10109  | ARPC2     | actin related protein 2/3 complex subunit 2               |
| 8411   | EEA1      | early endosome antigen 1                                  |
| 11021  | RAB35     | RAB35, member RAS oncogene family                         |
| 23325  | WASHC4    | WASH complex subunit 4                                    |
| 56288  | PARD3     | par-3 family cell polarity regulator                      |
| 6643   | SNX2      | sorting nexin 2                                           |

|        |         |                                                                                                     |
|--------|---------|-----------------------------------------------------------------------------------------------------|
| 9146   | HGS     | hepatocyte growth factor-regulated tyrosine kinase substrate                                        |
| 858    | CAV2    | caveolin 2                                                                                          |
| 5868   | RAB5A   | RAB5A, member RAS oncogene family                                                                   |
| 7314   | UBB     | ubiquitin B                                                                                         |
| 3310   | HSPA6   | heat shock protein family A (Hsp70) member 6                                                        |
| 50807  | ASAP1   | ArfGAP with SH3 domain, ankyrin repeat and PH domain 1                                              |
| 3799   | KIF5B   | kinesin family member 5B                                                                            |
| 58533  | SNX6    | sorting nexin 6                                                                                     |
| 440073 | IQSEC3  | IQ motif and Sec7 domain 3                                                                          |
| 26286  | ARFGAP3 | ADP ribosylation factor GTPase activating protein 3                                                 |
| 27243  | CHMP2A  | charged multivesicular body protein 2A                                                              |
| 57132  | CHMP1B  | charged multivesicular body protein 1B                                                              |
| 55040  | EPN3    | epsin 3                                                                                             |
| 8729   | GBF1    | golgi brefeldin A resistant guanine nucleotide exchange factor 1                                    |
| 9829   | DNAJC6  | DnaJ heat shock protein family (Hsp40) member C6                                                    |
| 5662   | PSD     | pleckstrin and Sec7 domain containing                                                               |
| 7852   | CXCR4   | C-X-C motif chemokine receptor 4                                                                    |
| 30011  | SH3KBP1 | SH3 domain containing kinase binding protein 1                                                      |
| 51534  | VTA1    | vesicle trafficking 1                                                                               |
| 7189   | TRAF6   | TNF receptor associated factor 6                                                                    |
| 89853  | MVB12B  | multivesicular body subunit 12B                                                                     |
| 51028  | VPS36   | vacuolar protein sorting 36 homolog                                                                 |
| 9267   | CYTH1   | cytohesin 1                                                                                         |
| 10564  | ARFGEF2 | ADP ribosylation factor guanine nucleotide exchange factor 2                                        |
| 118813 | ZFYVE27 | zinc finger FYVE-type containing 27                                                                 |
| 23327  | NEDD4L  | neural precursor cell expressed, developmentally down-regulated 4-like, E3 ubiquitin protein ligase |
| 838    | CASP5   | caspase 5                                                                                           |
| 10628  | TXNIP   | thioredoxin interacting protein                                                                     |
| 3665   | IRF7    | interferon regulatory factor 7                                                                      |
| 7158   | TP53BP1 | tumor protein p53 binding protein 1                                                                 |
| 4940   | OAS3    | 2'-5'-oligoadenylate synthetase 3                                                                   |
| 10910  | SUGT1   | SGT1 homolog, MIS12 kinetochore complex assembly cochaperone                                        |
| 4938   | OAS1    | 2'-5'-oligoadenylate synthetase 1                                                                   |
| 7295   | TXN     | thioredoxin                                                                                         |
| 114769 | CARD16  | caspase recruitment domain family member 16                                                         |
| 4793   | NFKBIB  | NFKB inhibitor beta                                                                                 |
| 8767   | RIPK2   | receptor interacting serine/threonine kinase 2                                                      |
| 118429 | ANTXR2  | ANTXR cell adhesion molecule 2                                                                      |
| 3428   | IFI16   | interferon gamma inducible protein 16                                                               |
| 10392  | NOD1    | nucleotide binding oligomerization domain containing 1                                              |
| 9641   | IKBKE   | inhibitor of nuclear factor kappa B kinase subunit epsilon                                          |
| 55054  | ATG16L1 | autophagy related 16 like 1                                                                         |
| 837    | CASP4   | caspase 4                                                                                           |
| 4939   | OAS2    | 2'-5'-oligoadenylate synthetase 2                                                                   |
| 6041   | RNASEL  | ribonuclease L                                                                                      |
| 79184  | BRCC3   | BRCA1/BRCA2-containing complex subunit 3                                                            |
| 440068 | CARD17  | caspase recruitment domain family member 17                                                         |
| 3661   | IRF3    | interferon regulatory factor 3                                                                      |
| 9474   | ATG5    | autophagy related 5                                                                                 |
| 24145  | PANX1   | pannexin 1                                                                                          |

|        |         |                                                        |
|--------|---------|--------------------------------------------------------|
| 9636   | ISG15   | ISG15 ubiquitin-like modifier                          |
| 79132  | DHX58   | DExH-box helicase 58                                   |
| 5300   | PIN1    | peptidylprolyl cis/trans isomerase, NIMA-interacting 1 |
| 64135  | IFIH1   | interferon induced with helicase C domain 1            |
| 9755   | TBKBP1  | TBK1 binding protein 1                                 |
| 7187   | TRAF3   | TNF receptor associated factor 3                       |
| 23586  | DDX58   | DExD/H-box helicase 58                                 |
| 115004 | CGAS    | cyclic GMP-AMP synthase                                |
| 5441   | POLR2L  | RNA polymerase II subunit L                            |
| 661    | POLR3D  | RNA polymerase III subunit D                           |
| 9533   | POLR1C  | RNA polymerase I and III subunit C                     |
| 5440   | POLR2K  | RNA polymerase II subunit K                            |
| 55703  | POLR3B  | RNA polymerase III subunit B                           |
| 10622  | POLR3G  | RNA polymerase III subunit G                           |
| 10621  | POLR3F  | RNA polymerase III subunit F                           |
| 84265  | POLR3GL | RNA polymerase III subunit G like                      |
| 103    | ADAR    | adenosine deaminase, RNA specific                      |
| 51728  | POLR3K  | RNA polymerase III subunit K                           |
| 10623  | POLR3C  | RNA polymerase III subunit C                           |
| 11128  | POLR3A  | RNA polymerase III subunit A                           |
| 6280   | S100A9  | S100 calcium binding protein A9                        |
| 8061   | FOSL1   | FOS like 1, AP-1 transcription factor subunit          |
| 23765  | IL17RA  | interleukin 17 receptor A                              |
| 4322   | MMP13   | matrix metalloproteinase 13                            |
| 2354   | FOSB    | FosB proto-oncogene, AP-1 transcription factor subunit |
| 1994   | ELAVL1  | ELAV like RNA binding protein 1                        |
| 7184   | HSP90B1 | heat shock protein 90 beta family member 1             |
| 1557   | CYP2C19 | cytochrome P450 family 2 subfamily C member 19         |
| 2330   | FMO5    | flavin containing monooxygenase 5                      |
| 4129   | MAOB    | monoamine oxidase B                                    |
| 2329   | FMO4    | flavin containing monooxygenase 4                      |
| 4128   | MAOA    | monoamine oxidase A                                    |
| 127    | ADH4    | alcohol dehydrogenase 4 (class II), pi polypeptide     |
| 7367   | UGT2B17 | UDP glucuronosyltransferase family 2 member B17        |
| 2938   | GSTA1   | glutathione S-transferase alpha 1                      |
| 2948   | GSTM4   | glutathione S-transferase mu 4                         |
| 79799  | UGT2A3  | UDP glucuronosyltransferase family 2 member A3         |
| 130    | ADH6    | alcohol dehydrogenase 6 (class V)                      |
| 2326   | FMO1    | flavin containing monooxygenase 1                      |
| 2941   | GSTA4   | glutathione S-transferase alpha 4                      |
| 128    | ADH5    | alcohol dehydrogenase 5 (class III), chi polypeptide   |
| 2939   | GSTA2   | glutathione S-transferase alpha 2                      |
| 51733  | UPB1    | beta-ureidopropionase 1                                |
| 2990   | GUSB    | glucuronidase beta                                     |
| 10     | NAT2    | N-acetyltransferase 2                                  |
| 1066   | CES1    | carboxylesterase 1                                     |
| 1806   | DPYD    | dihydropyrimidine dehydrogenase                        |
| 54963  | UCKL1   | uridine-cytidine kinase 1 like 1                       |
| 8824   | CES2    | carboxylesterase 2                                     |
| 2946   | GSTM2   | glutathione S-transferase mu 2                         |
| 83549  | UCK1    | uridine-cytidine kinase 1                              |



|        |          |                                                                     |
|--------|----------|---------------------------------------------------------------------|
| 978    | CDA      | cytidine deaminase                                                  |
| 22     | ABCB7    | ATP binding cassette subfamily B member 7                           |
| 1244   | ABCC2    | ATP binding cassette subfamily C member 2                           |
| 23461  | ABCA5    | ATP binding cassette subfamily A member 5                           |
| 368    | ABCC6    | ATP binding cassette subfamily C member 6                           |
| 23456  | ABCB10   | ATP binding cassette subfamily B member 10                          |
| 20     | ABCA2    | ATP binding cassette subfamily A member 2                           |
| 19     | ABCA1    | ATP binding cassette subfamily A member 1                           |
| 10060  | ABCC9    | ATP binding cassette subfamily C member 9                           |
| 10058  | ABCB6    | ATP binding cassette subfamily B member 6 (Langereis blood group)   |
| 8714   | ABCC3    | ATP binding cassette subfamily C member 3                           |
| 5244   | ABCB4    | ATP binding cassette subfamily B member 4                           |
| 5826   | ABCD4    | ATP binding cassette subfamily D member 4                           |
| 9619   | ABCG1    | ATP binding cassette subfamily G member 1                           |
| 10349  | ABCA10   | ATP binding cassette subfamily A member 10                          |
| 21     | ABCA3    | ATP binding cassette subfamily A member 3                           |
| 6518   | SLC2A5   | solute carrier family 2 member 5                                    |
| 6523   | SLC5A1   | solute carrier family 5 member 1                                    |
| 776    | CACNA1D  | calcium voltage-gated channel subunit alpha1 D                      |
| 2542   | SLC37A4  | solute carrier family 37 member 4                                   |
| 481    | ATP1B1   | ATPase Na <sup>+</sup> /K <sup>+</sup> transporting subunit beta 1  |
| 6476   | SI       | sucrase-isomaltase                                                  |
| 6514   | SLC2A2   | solute carrier family 2 member 2                                    |
| 93432  | MGAM2    | maltase-glucoamylase 2 (putative)                                   |
| 8972   | MGAM     | maltase-glucoamylase                                                |
| 476    | ATP1A1   | ATPase Na <sup>+</sup> /K <sup>+</sup> transporting subunit alpha 1 |
| 7512   | XPNPEP2  | X-prolyl aminopeptidase 2                                           |
| 11136  | SLC7A9   | solute carrier family 7 member 9                                    |
| 117247 | SLC16A10 | solute carrier family 16 member 10                                  |
| 4224   | MEP1A    | meprin A subunit alpha                                              |
| 6519   | SLC3A1   | solute carrier family 3 member 1                                    |
| 206358 | SLC36A1  | solute carrier family 36 member 1                                   |
| 9056   | SLC7A7   | solute carrier family 7 member 7                                    |
| 6564   | SLC15A1  | solute carrier family 15 member 1                                   |
| 1803   | DPP4     | dipeptidyl peptidase 4                                              |
| 1277   | COL1A1   | collagen type I alpha 1 chain                                       |
| 1291   | COL6A1   | collagen type VI alpha 1 chain                                      |
| 6505   | SLC1A1   | solute carrier family 1 member 1                                    |
| 1358   | CPA2     | carboxypeptidase A2                                                 |
| 59272  | ACE2     | angiotensin I converting enzyme 2                                   |
| 1303   | COL12A1  | collagen type XII alpha 1 chain                                     |
| 5547   | PRCP     | prolylcarboxypeptidase                                              |
| 54407  | SLC38A2  | solute carrier family 38 member 2                                   |
| 3783   | KCNN4    | potassium calcium-activated channel subfamily N member 4            |
| 1290   | COL5A2   | collagen type V alpha 2 chain                                       |
| 4547   | MTTP     | microsomal triglyceride transfer protein                            |
| 8611   | PLPP1    | phospholipid phosphatase 1                                          |
| 2169   | FABP2    | fatty acid binding protein 2                                        |
| 335    | APOA1    | apolipoprotein A1                                                   |
| 8694   | DGAT1    | diacylglycerol O-acyltransferase 1                                  |
| 80168  | MOGAT2   | monoacylglycerol O-acyltransferase 2                                |

|        |          |                                                       |
|--------|----------|-------------------------------------------------------|
| 84647  | PLA2G12B | phospholipase A2 group XIIB                           |
| 338    | APOB     | apolipoprotein B                                      |
| 5408   | PNLIPRP2 | pancreatic lipase related protein 2 (gene/pseudogene) |
| 346606 | MOGAT3   | monoacylglycerol O-acyltransferase 3                  |
| 949    | SCARB1   | scavenger receptor class B member 1                   |
| 39     | ACAT2    | acetyl-CoA acetyltransferase 2                        |
| 84649  | DGAT2    | diacylglycerol O-acyltransferase 2                    |
| 337    | APOA4    | apolipoprotein A4                                     |
| 1056   | CEL      | carboxyl ester lipase                                 |
| 9963   | SLC23A1  | solute carrier family 23 member 1                     |
| 8029   | CUBN     | cubilin                                               |
| 6948   | TCN2     | transcobalamin 2                                      |
| 151056 | PLB1     | phospholipase B1                                      |
| 80704  | SLC19A3  | solute carrier family 19 member 3                     |
| 686    | BTD      | biotinidase                                           |
| 55788  | LMBRD1   | LMBR1 domain containing 1                             |
| 5948   | RBP2     | retinol binding protein 2                             |

**Supplementary Table S5. The names of the 483 genes that were visualized in Figure 6**

| <b>ENTREZID</b> | <b>SYMBOL</b> | <b>GENENAME</b>                                          |
|-----------------|---------------|----------------------------------------------------------|
| 248             | ALPI          | alkaline phosphatase, intestinal                         |
| 1670            | DEFA5         | defensin alpha 5                                         |
| 1671            | DEFA6         | defensin alpha 6                                         |
| 4295            | MLN           | motilin                                                  |
| 4225            | MEP1B         | meprin A subunit beta                                    |
| 338             | APOB          | apolipoprotein B                                         |
| 3938            | LCT           | lactase                                                  |
| 6476            | SI            | sucrase-isomaltase                                       |
| 79853           | TM4SF20       | transmembrane 4 L six family member 20                   |
| 64240           | ABCG5         | ATP binding cassette subfamily G member 5                |
| 2172            | FABP6         | fatty acid binding protein 6                             |
| 5651            | TMPRSS15      | transmembrane serine protease 15                         |
| 2695            | GIP           | gastric inhibitory polypeptide                           |
| 5068            | REG3A         | regenerating family member 3 alpha                       |
| 4224            | MEP1A         | meprin A subunit alpha                                   |
| 339             | APOBEC1       | apolipoprotein B mRNA editing enzyme catalytic subunit 1 |
| 4547            | MTTP          | microsomal triglyceride transfer protein                 |
| 2169            | FABP2         | fatty acid binding protein 2                             |
| 1576            | CYP3A4        | cytochrome P450 family 3 subfamily A member 4            |
| 795             | S100G         | S100 calcium binding protein G                           |
| 54860           | MS4A12        | membrane spanning 4-domains A12                          |
| 229             | ALDOB         | aldolase, fructose-bisphosphate B                        |
| 343             | AQP8          | aquaporin 8                                              |
| 6527            | SLC5A4        | solute carrier family 5 member 4                         |
| 10022           | INSL5         | insulin like 5                                           |
| 4640            | MYO1A         | myosin IA                                                |
| 9154            | SLC28A1       | solute carrier family 28 member 1                        |
| 6370            | CCL25         | C-C motif chemokine ligand 25                            |
| 10              | NAT2          | N-acetyltransferase 2                                    |
| 56667           | MUC13         | mucin 13, cell surface associated                        |
| 4583            | MUC2          | mucin 2, oligomeric mucus/gel-forming                    |
| 2984            | GUCY2C        | guanylate cyclase 2C                                     |
| 54827           | NXPE4         | neurexophilin and PC-esterase domain family member 4     |
| 2981            | GUCA2B        | guanylate cyclase activator 2B                           |
| 27299           | ADAMDEC1      | ADAM like decysin 1                                      |
| 63924           | CIDEC         | cell death inducing DFFA like effector c                 |
| 1557            | CYP2C19       | cytochrome P450 family 2 subfamily C member 19           |
| 54658           | UGT1A1        | UDP glucuronosyltransferase family 1 member A1           |
| 640             | BLK           | BLK proto-oncogene, Src family tyrosine kinase           |
| 79154           | DHRS11        | dehydrogenase/reductase 11                               |
| 11148           | HHLA2         | HERV-H LTR-associating 2                                 |
| 2742            | GLRA2         | glycine receptor alpha 2                                 |
| 5009            | OTC           | ornithine carbamoyltransferase                           |
| 5357            | PLS1          | plastin 1                                                |
| 8435            | SOAT2         | sterol O-acyltransferase 2                               |
| 347853          | TBX10         | T-box 10                                                 |
| 24146           | CLDN15        | claudin 15                                               |
| 80168           | MOGAT2        | monoacylglycerol O-acyltransferase 2                     |
| 1045            | CDX2          | caudal type homeobox 2                                   |

|        |          |                                                     |
|--------|----------|-----------------------------------------------------|
| 10004  | NAALADL1 | N-acetylated alpha-linked acidic dipeptidase like 1 |
| 23563  | CHST5    | carbohydrate sulfotransferase 5                     |
| 1800   | DPEP1    | dipeptidase 1                                       |
| 3174   | HNF4G    | hepatocyte nuclear factor 4 gamma                   |
| 9058   | SLC13A2  | solute carrier family 13 member 2                   |
| 6523   | SLC5A1   | solute carrier family 5 member 1                    |
| 1015   | CDH17    | cadherin 17                                         |
| 346562 | GNAT3    | G protein subunit alpha transducin 3                |
| 80022  | MYO15B   | myosin XVB                                          |
| 2494   | NR5A2    | nuclear receptor subfamily 5 group A member 2       |
| 79861  | TUBAL3   | tubulin alpha like 3                                |
| 79908  | BTNL8    | butyrophilin like 8                                 |
| 8694   | DGAT1    | diacylglycerol O-acyltransferase 1                  |
| 3960   | LGALS4   | galectin 4                                          |
| 64922  | LRRC19   | leucine rich repeat containing 19                   |
| 5697   | PYY      | peptide YY                                          |
| 10050  | SLC17A4  | solute carrier family 17 member 4                   |
| 55630  | SLC39A4  | solute carrier family 39 member 4                   |
| 9032   | TM4SF5   | transmembrane 4 L six family member 5               |
| 7512   | XPNPEP2  | X-prolyl aminopeptidase 2                           |
| 53630  | BCO1     | beta-carotene oxygenase 1                           |
| 63928  | CHP2     | calcineurin like EF-hand protein 2                  |
| 2938   | GSTA1    | glutathione S-transferase alpha 1                   |
| 10481  | HOXB13   | homeobox B13                                        |
| 3957   | LGALS2   | galectin 2                                          |
| 6564   | SLC15A1  | solute carrier family 15 member 1                   |
| 6514   | SLC2A2   | solute carrier family 2 member 2                    |
| 6689   | SPIB     | Spi-B transcription factor                          |
| 51066  | SSUH2    | ssu-2 homolog (C. elegans)                          |
| 11181  | TREH     | trehalase                                           |
| 7366   | UGT2B15  | UDP glucuronosyltransferase family 2 member B15     |
| 29974  | A1CF     | APOBEC1 complementation factor                      |
| 838    | CASP5    | caspase 5                                           |
| 973    | CD79A    | CD79a molecule                                      |
| 54825  | CDHR2    | cadherin related family member 2                    |
| 53841  | CDHR5    | cadherin related family member 5                    |
| 27141  | CIDEB    | cell death inducing DFFA like effector b            |
| 8529   | CYP4F2   | cytochrome P450 family 4 subfamily F member 2       |
| 1644   | DDC      | dopa decarboxylase                                  |
| 2168   | FABP1    | fatty acid binding protein 1                        |
| 79368  | FCRL2    | Fc receptor like 2                                  |
| 3360   | HTR4     | 5-hydroxytryptamine receptor 4                      |
| 8856   | NR1I2    | nuclear receptor subfamily 1 group I member 2       |
| 5030   | P2RY4    | pyrimidinergic receptor P2Y4                        |
| 79799  | UGT2A3   | UDP glucuronosyltransferase family 2 member A3      |
| 95     | ACY1     | aminoacylase 1                                      |
| 337    | APOA4    | apolipoprotein A4                                   |
| 80117  | ARL14    | ADP ribosylation factor like GTPase 14              |
| 8708   | B3GALT1  | beta-1,3-galactosyltransferase 1                    |
| 55024  | BANK1    | B cell scaffold protein with ankyrin repeats 1      |
| 759    | CA1      | carbonic anhydrase 1                                |

|        |          |                                                       |
|--------|----------|-------------------------------------------------------|
| 885    | CCK      | cholecystokinin                                       |
| 930    | CD19     | CD19 molecule                                         |
| 4166   | CHST6    | carbohydrate sulfotransferase 6                       |
| 1179   | CLCA1    | chloride channel accessory 1                          |
| 22802  | CLCA4    | chloride channel accessory 4                          |
| 1755   | DMBT1    | deleted in malignant brain tumors 1                   |
| 9514   | GAL3ST1  | galactose-3-O-sulfotransferase 1                      |
| 26290  | GALNT8   | polypeptide N-acetylgalactosaminyltransferase 8       |
| 8811   | GALR2    | galanin receptor 2                                    |
| 10223  | GPA33    | glycoprotein A33                                      |
| 3769   | KCNJ13   | potassium voltage-gated channel subfamily J member 13 |
| 3795   | KHK      | ketoheokinase                                         |
| 54474  | KRT20    | keratin 20                                            |
| 10637  | LEFTY1   | left-right determination factor 1                     |
| 126353 | MISP     | mitotic spindle positioning                           |
| 931    | MS4A1    | membrane spanning 4-domains A1                        |
| 4648   | MYO7B    | myosin VIIB                                           |
| 6344   | SCTR     | secretin receptor                                     |
| 27284  | SULT1B1  | sulfotransferase family 1B member 1                   |
| 7104   | TM4SF4   | transmembrane 4 L six family member 4                 |
| 79838  | TMC5     | transmembrane channel like 5                          |
| 7166   | TPH1     | tryptophan hydroxylase 1                              |
| 7429   | VIL1     | villin 1                                              |
| 29802  | VPREB3   | V-set pre-B cell surrogate light chain 3              |
| 653808 | ZG16     | zymogen granule protein 16                            |
| 1636   | ACE      | angiotensin I converting enzyme                       |
| 59272  | ACE2     | angiotensin I converting enzyme 2                     |
| 51703  | ACSL5    | acyl-CoA synthetase long chain family member 5        |
| 100    | ADA      | adenosine deaminase                                   |
| 81693  | AMN      | amion associated transmembrane protein                |
| 26     | AOC1     | amine oxidase, copper containing 1                    |
| 23526  | ARHGAP45 | Rho GTPase activating protein 45                      |
| 398    | ARHGDI3  | Rho GDP dissociation inhibitor gamma                  |
| 474    | ATOH1    | atonal bHLH transcription factor 1                    |
| 80115  | BAIAP2L2 | BAI1 associated protein 2 like 2                      |
| 10917  | BTNL3    | butyrophilin like 3                                   |
| 766    | CA7      | carbonic anhydrase 7                                  |
| 1235   | CCR6     | C-C motif chemokine receptor 6                        |
| 959    | CD40LG   | CD40 ligand                                           |
| 8029   | CUBN     | cubilin                                               |
| 1577   | CYP3A5   | cytochrome P450 family 3 subfamily A member 5         |
| 1943   | EFNA2    | ephrin A2                                             |
| 79574  | EPS8L3   | EPS8 like 3                                           |
| 8857   | FCGBP    | Fc fragment of IgG binding protein                    |
| 9214   | FCMR     | Fc fragment of IgM receptor                           |
| 2859   | GPR35    | G protein-coupled receptor 35                         |
| 3001   | GZMA     | granzyme A                                            |
| 8369   | HIST1H4G | histone cluster 1 H4 family member g                  |
| 80201  | HKDC1    | hexokinase domain containing 1                        |
| 3219   | HOXB9    | homeobox B9                                           |
| 3575   | IL7R     | interleukin 7 receptor                                |

|           |          |                                                                                      |
|-----------|----------|--------------------------------------------------------------------------------------|
| 3805      | KIR2DL4  | killer cell immunoglobulin like receptor, two Ig domains and long cytoplasmic tail 4 |
| 93432     | MGAM2    | maltase-glucoamylase 2 (putative)                                                    |
| 4495      | MT1G     | metallothionein 1G                                                                   |
| 29881     | NPC1L1   | NPC1 like intracellular cholesterol transporter 1                                    |
| 4922      | NTS      | neurotensin                                                                          |
| 5106      | PCK2     | phosphoenolpyruvate carboxykinase 2, mitochondrial                                   |
| 5125      | PCSK5    | proprotein convertase subtilisin/kexin type 5                                        |
| 3651      | PDX1     | pancreatic and duodenal homeobox 1                                                   |
| 5331      | PLCB3    | phospholipase C beta 3                                                               |
| 54866     | PPP1R14D | protein phosphatase 1 regulatory inhibitor subunit 14D                               |
| 54546     | RNF186   | ring finger protein 186                                                              |
| 23314     | SATB2    | SATB homeobox 2                                                                      |
| 6425      | SFRP5    | secreted frizzled related protein 5                                                  |
| 10166     | SLC25A15 | solute carrier family 25 member 15                                                   |
| 1811      | SLC26A3  | solute carrier family 26 member 3                                                    |
| 9153      | SLC28A2  | solute carrier family 28 member 2                                                    |
| 54716     | SLC6A20  | solute carrier family 6 member 20                                                    |
| 6750      | SST      | somatostatin                                                                         |
| 53345     | TM6SF2   | transmembrane 6 superfamily member 2                                                 |
| 8876      | VNN1     | vanin 1                                                                              |
| 126       | ADH1C    | alcohol dehydrogenase 1C (class I), gamma polypeptide                                |
| 54831     | BEST2    | bestrophin 2                                                                         |
| 91860     | CALML4   | calmodulin like 4                                                                    |
| 92211     | CDHR1    | cadherin related family member 1                                                     |
| 1044      | CDX1     | caudal type homeobox 1                                                               |
| 8824      | CES2     | carboxylesterase 2                                                                   |
| 1412      | CRYBA2   | crystallin beta A2                                                                   |
| 2330      | FMO5     | flavin containing monooxygenase 5                                                    |
| 2838      | GPR15    | G protein-coupled receptor 15                                                        |
| 57476     | GRAMD1B  | GRAM domain containing 1B                                                            |
| 81618     | ITM2C    | integral membrane protein 2C                                                         |
| 3706      | ITPKA    | inositol-trisphosphate 3-kinase A                                                    |
| 4065      | LY75     | lymphocyte antigen 75                                                                |
| 4063      | LY9      | lymphocyte antigen 9                                                                 |
| 8972      | MGAM     | maltase-glucoamylase                                                                 |
| 5026      | P2RX5    | purinergic receptor P2X 5                                                            |
| 5078      | PAX4     | paired box 4                                                                         |
| 5452      | POU2F2   | POU class 2 homeobox 2                                                               |
| 100533178 | PRORY    | proline rich Y-linked                                                                |
| 5794      | PTPRH    | protein tyrosine phosphatase, receptor type H                                        |
| 6343      | SCT      | secretin                                                                             |
| 6462      | SHBG     | sex hormone binding globulin                                                         |
| 6555      | SLC10A2  | solute carrier family 10 member 2                                                    |
| 55065     | SLC52A1  | solute carrier family 52 member 1                                                    |
| 159963    | SLC5A12  | solute carrier family 5 member 12                                                    |
| 11136     | SLC7A9   | solute carrier family 7 member 9                                                     |
| 6664      | SOX11    | SRY-box 11                                                                           |
| 26228     | STAP1    | signal transducing adaptor family member 1                                           |
| 26230     | TIAM2    | T cell lymphoma invasion and metastasis 2                                            |
| 80008     | TMEM156  | transmembrane protein 156                                                            |

|        |          |                                                                                      |
|--------|----------|--------------------------------------------------------------------------------------|
| 89870  | TRIM15   | tripartite motif containing 15                                                       |
| 7103   | TSPAN8   | tetraspanin 8                                                                        |
| 13     | AADAC    | arylacetamide deacetylase                                                            |
| 9625   | AATK     | apoptosis associated tyrosine kinase                                                 |
| 5243   | ABCB1    | ATP binding cassette subfamily B member 1                                            |
| 1244   | ABCC2    | ATP binding cassette subfamily C member 2                                            |
| 215    | ABCD1    | ATP binding cassette subfamily D member 1                                            |
| 9429   | ABCG2    | ATP binding cassette subfamily G member 2 (Junior blood group)                       |
| 28     | ABO      | ABO, alpha 1-3-N-acetylgalactosaminyltransferase and alpha 1-3-galactosyltransferase |
| 51554  | ACKR4    | atypical chemokine receptor 4                                                        |
| 72     | ACTG2    | actin, gamma 2, smooth muscle, enteric                                               |
| 11033  | ADAP1    | ArfGAP with dual PH domains 1                                                        |
| 84830  | ADTRP    | androgen dependent TFPI regulating protein                                           |
| 79814  | AGMAT    | agmatinase                                                                           |
| 23382  | AHCYL2   | adenosylhomocysteinase like 2                                                        |
| 57016  | AKR1B10  | aldo-keto reductase family 1 member B10                                              |
| 8644   | AKR1C3   | aldo-keto reductase family 1 member C3                                               |
| 22977  | AKR7A3   | aldo-keto reductase family 7 member A3                                               |
| 290    | ANPEP    | alanyl aminopeptidase, membrane                                                      |
| 312    | ANXA13   | annexin A13                                                                          |
| 27237  | ARHGEF16 | Rho guanine nucleotide exchange factor 16                                            |
| 23120  | ATP10B   | ATPase phospholipid transporting 10B (putative)                                      |
| 476    | ATP1A1   | ATPase Na <sup>+</sup> /K <sup>+</sup> transporting subunit alpha 1                  |
| 9914   | ATP2C2   | ATPase secretory pathway Ca <sup>2+</sup> transporting 2                             |
| 5205   | ATP8B1   | ATPase phospholipid transporting 8B1                                                 |
| 10677  | AVIL     | advillin                                                                             |
| 10317  | B3GALT5  | beta-1,3-galactosyltransferase 5                                                     |
| 10331  | B3GNT3   | UDP-GlcNAc:betaGal beta-1,3-N-acetylglucosaminyltransferase 3                        |
| 8537   | BCAS1    | breast carcinoma amplified sequence 1                                                |
| 79370  | BCL2L14  | BCL2 like 14                                                                         |
| 330    | BIRC3    | baculoviral IAP repeat containing 3                                                  |
| 651    | BMP3     | bone morphogenetic protein 3                                                         |
| 656    | BMP8B    | bone morphogenetic protein 8b                                                        |
| 339479 | BRINP3   | BMP/retinoic acid inducible neural specific 3                                        |
| 683    | BST1     | bone marrow stromal cell antigen 1                                                   |
| 685    | BTC      | betacellulin                                                                         |
| 53838  | C11orf24 | chromosome 11 open reading frame 24                                                  |
| 64073  | C19orf33 | chromosome 19 open reading frame 33                                                  |
| 79762  | C1orf115 | chromosome 1 open reading frame 115                                                  |
| 760    | CA2      | carbonic anhydrase 2                                                                 |
| 762    | CA4      | carbonic anhydrase 4                                                                 |
| 726    | CAPN5    | calpain 5                                                                            |
| 10753  | CAPN9    | calpain 9                                                                            |
| 29775  | CARD10   | caspase recruitment domain family member 10                                          |
| 843    | CASP10   | caspase 10                                                                           |
| 839    | CASP6    | caspase 6                                                                            |
| 840    | CASP7    | caspase 7                                                                            |
| 23624  | CBLC     | Cbl proto-oncogene C                                                                 |
| 873    | CBR1     | carbonyl reductase 1                                                                 |
| 80323  | CCDC68   | coiled-coil domain containing 68                                                     |

|       |         |                                                           |
|-------|---------|-----------------------------------------------------------|
| 6346  | CCL1    | C-C motif chemokine ligand 1                              |
| 6356  | CCL11   | C-C motif chemokine ligand 11                             |
| 6369  | CCL24   | C-C motif chemokine ligand 24                             |
| 11126 | CD160   | CD160 molecule                                            |
| 57126 | CD177   | CD177 molecule                                            |
| 83461 | CDCA3   | cell division cycle associated 3                          |
| 999   | CDH1    | cadherin 1                                                |
| 1030  | CDKN2B  | cyclin dependent kinase inhibitor 2B                      |
| 1040  | CDS1    | CDP-diacylglycerol synthase 1                             |
| 634   | CEACAM1 | carcinoembryonic antigen related cell adhesion molecule 1 |
| 1048  | CEACAM5 | carcinoembryonic antigen related cell adhesion molecule 5 |
| 1087  | CEACAM7 | carcinoembryonic antigen related cell adhesion molecule 7 |
| 23491 | CES3    | carboxylesterase 3                                        |
| 1124  | CHN2    | chimerin 2                                                |
| 1132  | CHRM4   | cholinergic receptor muscarinic 4                         |
| 1139  | CHRNA7  | cholinergic receptor nicotinic alpha 7 subunit            |
| 10518 | CIB2    | calcium and integrin binding family member 2              |
| 1159  | CKMT1B  | creatine kinase, mitochondrial 1B                         |
| 1181  | CLCN2   | chloride voltage-gated channel 2                          |
| 1365  | CLDN3   | claudin 3                                                 |
| 1366  | CLDN7   | claudin 7                                                 |
| 53405 | CLIC5   | chloride intracellular channel 5                          |
| 7464  | CORO2A  | coronin 2A                                                |
| 1510  | CTSE    | cathepsin E                                               |
| 1525  | CXADR   | CXADR, Ig-like cell adhesion molecule                     |
| 1562  | CYP2C18 | cytochrome P450 family 2 subfamily C member 18            |
| 1573  | CYP2J2  | cytochrome P450 family 2 subfamily J member 2             |
| 54905 | CYP2W1  | cytochrome P450 family 2 subfamily W member 1             |
| 66002 | CYP4F12 | cytochrome P450 family 4 subfamily F member 12            |
| 1600  | DAB1    | DAB1, reelin adaptor protein                              |
| 10170 | DHRS9   | dehydrogenase/reductase 9                                 |
| 56616 | DIABLO  | diablo IAP-binding mitochondrial protein                  |
| 79962 | DNAJC22 | DnaJ heat shock protein family (Hsp40) member C22         |
| 1773  | DNASE1  | deoxyribonuclease 1                                       |
| 1803  | DPP4    | dipeptidyl peptidase 4                                    |
| 1829  | DSG2    | desmoglein 2                                              |
| 1907  | EDN2    | endothelin 2                                              |
| 1908  | EDN3    | endothelin 3                                              |
| 1999  | ELF3    | E74 like ETS transcription factor 3                       |
| 80237 | ELL3    | elongation factor for RNA polymerase II 3                 |
| 2028  | ENPEP   | glutamyl aminopeptidase                                   |
| 5169  | ENPP3   | ectonucleotide pyrophosphatase/phosphodiesterase 3        |
| 957   | ENTPD5  | ectonucleoside triphosphate diphosphohydrolase 5          |
| 57089 | ENTPD7  | ectonucleoside triphosphate diphosphohydrolase 7          |
| 4072  | EPCAM   | epithelial cell adhesion molecule                         |
| 2048  | EPHB2   | EPH receptor B2                                           |
| 2053  | EPHX2   | epoxide hydrolase 2                                       |
| 64787 | EPS8L2  | EPS8 like 2                                               |
| 23474 | ETHE1   | ETHE1, persulfide dioxygenase                             |
| 51513 | ETV7    | ETS variant 7                                             |
| 2150  | F2RL1   | F2R like trypsin receptor 1                               |



|        |          |                                                                    |
|--------|----------|--------------------------------------------------------------------|
| 54854  | FAM83E   | family with sequence similarity 83 member E                        |
| 2195   | FAT1     | FAT atypical cadherin 1                                            |
| 54738  | FEV      | FEV, ETS transcription factor                                      |
| 2249   | FGF4     | fibroblast growth factor 4                                         |
| 2281   | FKBP1B   | FK506 binding protein 1B                                           |
| 55640  | FLVCR2   | feline leukemia virus subgroup C cellular receptor family member 2 |
| 2346   | FOLH1    | folate hydrolase 1                                                 |
| 2306   | FOXD2    | forkhead box D2                                                    |
| 2295   | FOXF2    | forkhead box F2                                                    |
| 8928   | FOXH1    | forkhead box H1                                                    |
| 2444   | FRK      | fyn related Src family tyrosine kinase                             |
| 2524   | FUT2     | fucosyltransferase 2                                               |
| 2525   | FUT3     | fucosyltransferase 3 (Lewis blood group)                           |
| 2528   | FUT6     | fucosyltransferase 6                                               |
| 5349   | FXYD3    | FXYD domain containing ion transport regulator 3                   |
| 7855   | FZD5     | frizzled class receptor 5                                          |
| 2626   | GATA4    | GATA binding protein 4                                             |
| 2650   | GCNT1    | glucosaminyl (N-acetyl) transferase 1, core 2                      |
| 2651   | GCNT2    | glucosaminyl (N-acetyl) transferase 2 (I blood group)              |
| 9245   | GCNT3    | glucosaminyl (N-acetyl) transferase 3, mucin type                  |
| 51301  | GCNT4    | glucosaminyl (N-acetyl) transferase 4, core 2                      |
| 54857  | GDPD2    | glycerophosphodiester phosphodiesterase domain containing 2        |
| 54810  | GIPC2    | GIPC PDZ domain containing family member 2                         |
| 2710   | GK       | glycerol kinase                                                    |
| 2767   | GNA11    | G protein subunit alpha 11                                         |
| 29909  | GPR171   | G protein-coupled receptor 171                                     |
| 9721   | GPRIN2   | G protein regulated inducer of neurite outgrowth 2                 |
| 79774  | GRTP1    | growth hormone regulated TBC protein 1                             |
| 55876  | GSDMB    | gasdermin B                                                        |
| 2948   | GSTM4    | glutathione S-transferase mu 4                                     |
| 474381 | H2AFB2   | H2A histone family member B2                                       |
| 9421   | HAND1    | heart and neural crest derivatives expressed 1                     |
| 9843   | HEPH     | hephaestin                                                         |
| 6927   | HNF1A    | HNF1 homeobox A                                                    |
| 3172   | HNF4A    | hepatocyte nuclear factor 4 alpha                                  |
| 3238   | HOXD12   | homeobox D12                                                       |
| 3239   | HOXD13   | homeobox D13                                                       |
| 54979  | HRASLS2  | HRAS like suppressor 2                                             |
| 3291   | HSD11B2  | hydroxysteroid 11-beta dehydrogenase 2                             |
| 51170  | HSD17B11 | hydroxysteroid 17-beta dehydrogenase 11                            |
| 3294   | HSD17B2  | hydroxysteroid 17-beta dehydrogenase 2                             |
| 3352   | HTR1D    | 5-hydroxytryptamine receptor 1D                                    |
| 3549   | IHH      | indian hedgehog                                                    |
| 3558   | IL2      | interleukin 2                                                      |
| 3574   | IL7      | interleukin 7                                                      |
| 55765  | INAVA    | innate immunity activator                                          |
| 3682   | ITGAE    | integrin subunit alpha E                                           |
| 3512   | JCHAIN   | joining chain of multimeric IgA and IgM                            |
| 81033  | KCNH6    | potassium voltage-gated channel subfamily H member 6               |
| 54207  | KCNK10   | potassium two pore domain channel subfamily K member 10            |
| 8645   | KCNK5    | potassium two pore domain channel subfamily K member 5             |

|       |         |                                                                            |
|-------|---------|----------------------------------------------------------------------------|
| 688   | KLF5    | Kruppel like factor 5                                                      |
| 55554 | KLK15   | kallikrein related peptidase 15                                            |
| 3859  | KRT12   | keratin 12                                                                 |
| 3880  | KRT19   | keratin 19                                                                 |
| 3856  | KRT8    | keratin 8                                                                  |
| 3927  | LASP1   | LIM and SH3 protein 1                                                      |
| 10162 | LPCAT3  | lysophosphatidylcholine acyltransferase 3                                  |
| 79782 | LRRC31  | leucine rich repeat containing 31                                          |
| 10586 | MAB21L2 | mab-21 like 2                                                              |
| 7851  | MALL    | mal, T cell differentiation protein like                                   |
| 11184 | MAP4K1  | mitogen-activated protein kinase kinase kinase kinase 1                    |
| 4248  | MGAT3   | mannosyl (beta-1,4-)-glycoprotein beta-1,4-N-acetylglucosaminyltransferase |
| 11282 | MGAT4B  | alpha-1,3-mannosyl-glycoprotein 4-beta-N-acetylglucosaminyltransferase B   |
| 4311  | MME     | membrane metalloendopeptidase                                              |
| 4324  | MMP15   | matrix metalloproteinase 15                                                |
| 55034 | MOCOS   | molybdenum cofactor sulfurase                                              |
| 4486  | MST1R   | macrophage stimulating 1 receptor                                          |
| 4496  | MT1H    | metallothionein 1H                                                         |
| 10903 | MTMR11  | myotubularin related protein 11                                            |
| 4543  | MTNR1A  | melatonin receptor 1A                                                      |
| 4585  | MUC4    | mucin 4, cell surface associated                                           |
| 79784 | MYH14   | myosin heavy chain 14                                                      |
| 9     | NAT1    | N-acetyltransferase 1                                                      |
| 9436  | NCR2    | natural cytotoxicity triggering receptor 2                                 |
| 50674 | NEUROG3 | neurogenin 3                                                               |
| 579   | NKX3-2  | NK3 homeobox 2                                                             |
| 4843  | NOS2    | nitric oxide synthase 2                                                    |
| 27035 | NOX1    | NADPH oxidase 1                                                            |
| 5540  | NPY4R   | neuropeptide Y receptor Y4                                                 |
| 8431  | NR0B2   | nuclear receptor subfamily 0 group B member 2                              |
| 51559 | NT5DC3  | 5'-nucleotidase domain containing 3                                        |
| 4923  | NTSR1   | neurotensin receptor 1                                                     |
| 4942  | OAT     | ornithine aminotransferase                                                 |
| 10562 | OLFM4   | olfactomedin 4                                                             |
| 4975  | OMP     | olfactory marker protein                                                   |
| 9480  | ONECUT2 | one cut homeobox 2                                                         |
| 79646 | PANK3   | pantothenate kinase 3                                                      |
| 64081 | PBLD    | phenazine biosynthesis like protein domain containing                      |
| 23590 | PDSS1   | decaprenyl diphosphate synthase subunit 1                                  |
| 79849 | PDZD3   | PDZ domain containing 3                                                    |
| 79955 | PDZD7   | PDZ domain containing 7                                                    |
| 5174  | PDZK1   | PDZ domain containing 1                                                    |
| 5184  | PEPD    | peptidase D                                                                |
| 23035 | PHLPP2  | PH domain and leucine rich repeat protein phosphatase 2                    |
| 5284  | PIGR    | polymeric immunoglobulin receptor                                          |
| 80235 | PIGZ    | phosphatidylinositol glycan anchor biosynthesis class Z                    |
| 5313  | PKLR    | pyruvate kinase L/R                                                        |
| 8399  | PLA2G10 | phospholipase A2 group X                                                   |
| 51316 | PLAC8   | placenta specific 8                                                        |
| 55200 | PLEKHG6 | pleckstrin homology and RhoGEF domain containing G6                        |
| 79949 | PLEKHS1 | pleckstrin homology domain containing S1                                   |

|        |            |                                                      |
|--------|------------|------------------------------------------------------|
| 79983  | POF1B      | POF1B, actin binding protein                         |
| 5450   | POU2AF1    | POU class 2 associating factor 1                     |
| 51012  | PRELID3B   | PRELI domain containing 3B                           |
| 5593   | PRKG2      | protein kinase cGMP-dependent 2                      |
| 5625   | PRODH      | proline dehydrogenase 1                              |
| 79170  | PRR15L     | proline rich 15 like                                 |
| 79899  | PRR5L      | proline rich 5 like                                  |
| 5652   | PRSS8      | serine protease 8                                    |
| 5753   | PTK6       | protein tyrosine kinase 6                            |
| 5800   | PTPRO      | protein tyrosine phosphatase, receptor type O        |
| 80223  | RAB11FIP1  | RAB11 family interacting protein 1                   |
| 64284  | RAB17      | RAB17, member RAS oncogene family                    |
| 54884  | RETSAT     | retinol saturase                                     |
| 79589  | RNF128     | ring finger protein 128, E3 ubiquitin protein ligase |
| 6195   | RPS6KA1    | ribosomal protein S6 kinase A1                       |
| 85477  | SCIN       | scinderin                                            |
| 6398   | SECTM1     | secreted and transmembrane 1                         |
| 8991   | SELENBP1   | selenium binding protein 1                           |
| 6414   | SELENOP    | selenoprotein P                                      |
| 57715  | SEMA4G     | semaphorin 4G                                        |
| 80031  | SEMA6D     | semaphorin 6D                                        |
| 22928  | SEPHS2     | selenophosphate synthetase 2                         |
| 6570   | SLC18A1    | solute carrier family 18 member A1                   |
| 6505   | SLC1A1     | solute carrier family 1 member 1                     |
| 5002   | SLC22A18   | solute carrier family 22 member 18                   |
| 5003   | SLC22A18A1 | solute carrier family 22 member 18 antisense         |
| 1836   | SLC26A2    | solute carrier family 26 member 2                    |
| 6518   | SLC2A5     | solute carrier family 2 member 5                     |
| 54020  | SLC37A1    | solute carrier family 37 member 1                    |
| 6519   | SLC3A1     | solute carrier family 3 member 1                     |
| 80736  | SLC44A4    | solute carrier family 44 member 4                    |
| 113235 | SLC46A1    | solute carrier family 46 member 1                    |
| 283537 | SLC46A3    | solute carrier family 46 member 3                    |
| 9497   | SLC4A7     | solute carrier family 4 member 7                     |
| 6532   | SLC6A4     | solute carrier family 6 member 4                     |
| 9056   | SLC7A7     | solute carrier family 7 member 7                     |
| 6549   | SLC9A2     | solute carrier family 9 member A2                    |
| 6550   | SLC9A3     | solute carrier family 9 member A3                    |
| 55512  | SMPD3      | sphingomyelin phosphodiesterase 3                    |
| 27293  | SMPDL3B    | sphingomyelin phosphodiesterase acid like 3B         |
| 6525   | SMTN       | smoothelin                                           |
| 27290  | SPINK4     | serine peptidase inhibitor, Kazal type 4             |
| 6692   | SPINT1     | serine peptidase inhibitor, Kunitz type 1            |
| 6717   | SRI        | sorcin                                               |
| 6751   | SSTR1      | somatostatin receptor 1                              |
| 6768   | ST14       | suppression of tumorigenicity 14                     |
| 55620  | STAP2      | signal transducing adaptor family member 2           |
| 55359  | STYK1      | serine/threonine/tyrosine kinase 1                   |
| 6799   | SULT1A2    | sulfotransferase family 1A member 2                  |
| 6783   | SULT1E1    | sulfotransferase family 1E member 1                  |
| 6865   | TACR2      | tachykinin receptor 2                                |

|           |           |                                                                  |
|-----------|-----------|------------------------------------------------------------------|
| 51567     | TDP2      | tyrosyl-DNA phosphodiesterase 2                                  |
| 27134     | TJP3      | tight junction protein 3                                         |
| 26007     | TKFC      | triokinase and FMN cyclase                                       |
| 100289255 | TMEM238L  | transmembrane protein 238 like                                   |
| 55321     | TMEM74B   | transmembrane protein 74B                                        |
| 7113      | TMPRSS2   | transmembrane serine protease 2                                  |
| 8792      | TNFRSF11A | TNF receptor superfamily member 11a                              |
| 608       | TNFRSF17  | TNF receptor superfamily member 17                               |
| 9966      | TNFSF15   | TNF superfamily member 15                                        |
| 9540      | TP53I3    | tumor protein p53 inducible protein 3                            |
| 25823     | TPSG1     | tryptase gamma 1                                                 |
| 10107     | TRIM10    | tripartite motif containing 10                                   |
| 11074     | TRIM31    | tripartite motif containing 31                                   |
| 8989      | TRPA1     | transient receptor potential cation channel subfamily A member 1 |
| 57113     | TRPC7     | transient receptor potential cation channel subfamily C member 7 |
| 140803    | TRPM6     | transient receptor potential cation channel subfamily M member 6 |
| 10103     | TSPAN1    | tetraspanin 1                                                    |
| 55020     | TTC38     | tetratricopeptide repeat domain 38                               |
| 7367      | UGT2B17   | UDP glucuronosyltransferase family 2 member B17                  |
| 54346     | UNC93A    | unc-93 homolog A                                                 |
| 10083     | USH1C     | USH1 protein network component harmonin                          |
| 7421      | VDR       | vitamin D receptor                                               |
| 50853     | VILL      | villin like                                                      |
| 7432      | VIP       | vasoactive intestinal peptide                                    |
| 54621     | VSIG10    | V-set and immunoglobulin domain containing 10                    |
| 7498      | XDH       | xanthine dehydrogenase                                           |
| 7504      | XK        | X-linked Kx blood group                                          |
| 51043     | ZBTB7B    | zinc finger and BTB domain containing 7B                         |
